# Supplementary material
Source: PubMed Central journal article supplement (PMC5529177)
Supplement: mmc2.pdf [file mmc2.pdf]

# How Does $Mg^{2+}$ Modulate the RNA Folding Mechanism: A Case Study of the G:C W:W Trans Basepair

Antarip Halder,<sup>1</sup> Rohit Roy,<sup>1</sup> Dhananjay Bhattacharyya,<sup>2</sup> and Abhijit Mitra<sup>1,\*</sup>

<sup>1</sup>Center for Computational Natural Sciences and Bioinformatics (CCNSB), International Institute of Information Technology (IIIT-H), Gachibowli, Hyderabad, India; and <sup>2</sup>Computational Science Division, Saha Institute of Nuclear Physics (SINP), Kolkata, India

**ABSTRACT** Reverse Watson-Crick G:C basepairs (G:C W:W Trans) occur frequently in different functional RNAs. This is one of the few basepairs whose gas-phase-optimized isolated geometry is inconsistent with the corresponding experimental geometry. Several earlier studies indicate that through post-transcriptional modification, direct protonation, or coordination with  $Mg^{2+}$ , accumulation of positive charge near N7 of guanine can stabilize the experimental geometry. Interestingly, recent studies reveal significant variation in the position of putatively bound  $Mg^{2+}$ . This, in conjunction with recently raised doubts regarding some of the  $Mg^{2+}$  assignments near the imino nitrogen of guanine, is suggestive of the existence of multiple  $Mg^{2+}$  binding modes for this basepair. Our detailed investigation of  $Mg^{2+}$ -bound G:C W:W Trans pairs occurring in high-resolution RNA crystal structures shows that they are found in 14 different contexts, eight of which display  $Mg^{2+}$  binding at the Hoogsteen edge of guanine. Further examination of occurrences in these eight contexts led to the characterization of three different  $Mg^{2+}$  binding modes: 1) direct binding via N7 coordination, 2) direct binding via O6 coordination, and 3) binding via hydrogen-bonding interaction with the first-shell water molecules. In the crystal structures, the latter two modes are associated with a buckled and propeller-twisted geometry of the basepair. Interestingly, respective optimized geometries of these different  $Mg^{2+}$  binding modes (optimized using six different DFT functionals) are consistent with their corresponding experimental geometries. Subsequent interaction energy calculations at the MP2 level, and decomposition of its components, suggest that for G:C W:W Trans,  $Mg^{2+}$  binding can fine tune the basepair geometries without compromising with their stability. Our results, therefore, underline the importance of the mode of binding of  $Mg^{2+}$  ions in shaping RNA structure, folding and function.

## INTRODUCTION

Consequent to the discovery of its enzymatic roles (1,2), RNA has been found to be associated with numerous biophysical processes (3). To execute these cellular processes, including regulation of gene expression and protein synthesis, RNA molecules are required to be folded in functionally competent structures that display a diverse repertoire of non-canonical basepairs (4). The unique geometry and stability of these noncanonical basepairs shape up the characteristic features of different structural motifs in RNA (5,6). Hence, recognizing the role of different noncanonical basepairs is important for developing a comprehensive understanding of the sequence-structure-function relationship in RNA.

In this context, quantum-mechanics-based theoretical studies of the intrinsic properties of these basepairs have

achieved remarkable success (7,8). This was possible because in most of the cases, minimum-energy geometries of the isolated basepairs obtained in the gas phase are very much consistent with their geometry as observed within the crystal environment (experimental geometry) (9–19). Naturally, those noncanonical basepairs whose minimum-energy structures are significantly different from their experimental geometry become the subject of interest. Identifying the physicochemical factors that stabilize these “away-from-equilibrium” local geometries within the crystal environment constitutes an important problem. On the one hand, it provides insight into RNA’s structural dynamics, and on the other, it provides a testbed for designing nucleic-acid-based nanodevices with switching potential. One classical example of such a noncanonical basepair is the Levitt basepair (20), the conserved interaction between G15 and C48 residues in tRNA. This crucial tertiary interaction is located at the elbow of the L-shaped structure of cytosolic tRNAs and mediates the interaction between the D and

Submitted February 3, 2017, and accepted for publication April 21, 2017.

\*Correspondence: [abi\\_chem@iiit.ac.in](mailto:abi_chem@iiit.ac.in)

Editor: Tamar Schlick.

<http://dx.doi.org/10.1016/j.bpj.2017.04.029>

© 2017

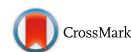

V arms. Within the crystal structure, the G15-C48 interaction is found to be present in reverse Watson-Crick geometry (RWC), stabilized by two hydrogen bonds. However, on isolated geometry optimization in the gas phase, it converges to a bifurcated geometry (Fig. 1), stabilized by two bifurcated hydrogen bonds (21). This bifurcated geometry can be classified as G-C Ww/Bs *trans*, according to the Leontis and Westhof nomenclature extended for bifurcated geometries (5,22). However, in this work, to annotate the basepairing interactions, we have followed a nomenclature slightly different from the Leontis and Westhof nomenclature. If edge X of base A interacts with edge Y of base B in *cis* (or *trans*) orientation, the interaction is annotated as A:B X:Y *Cis* (or A:B X:Y *Trans*). Therefore, the crystal geometry of the Levitt basepair is annotated as G:C W:W *Trans*.

Analyzing tRNA crystal structures, Oliva et al. (23) have identified that positive charge buildup at the Hoogsteen edge of guanine (at position N7), in the form of coordination with  $Mg^{2+}$  ion or post-transcriptional archaeosine modification, stabilizes the RWC geometry of the Levitt basepair. Binding of other divalent cations like  $Mn^{2+}$  and  $Co^{2+}$  at the N7 position of guanine also has a similar effect on the RWC geometry of G:C W:W *Trans* pair (24). However, occurrence of G:C W:W *Trans* basepairs is not limited to G15-C48 of tRNA; rather, they occur recurrently in 23S rRNAs (25). They are also present in class II preQ1 riboswitches and participate in the recognition mechanism (26). Chawla and co-workers have analyzed all such occurrences of the G:C W:W *Trans* pair in high-resolution RNA crystal structures and have found that two-thirds of the total occurrences of G:C W:W *Trans* are involved in higher-order interactions (e.g., base triples, base quartets, interaction with ordered surrounding water molecules and interaction with phosphate backbone) that stabilize its RWC geometry (25). In our earlier work, we have shown that direct protonation at the N7 position of guanine is sufficient to stabilize the RWC geometry (27). Note that protonation of nucleobases is thermodynamically unfavorable, since the  $pK_{a1}$  values of adenine ( $\sim 4.1$ ), guanine ( $\sim 3.2$ ) and cytosine ( $\sim 4.4$ ) are usually 2–3 units away from neutrality (28,29). However, the importance of charged nucleobases in modulating structure (30–33) and function (28,34,35) of nucleic acids is well documented in contemporary literature. Note that such nucleobase protonation remains “invisible”

even in the high-resolution x-ray crystal structures and can only be inferred through circumstantial evidence. Our quantum mechanics (QM) studies (36) suggest that the charge redistribution caused by N7 protonation in guanine is qualitatively equivalent to that caused by the coordination of N7 with  $Mg^{2+}$  ions (23). It is therefore hypothesized that guanine N7 protonation may act as a stabilizing factor for those instances of G:C W:W *Trans* pairs that do not show post-transcriptional modification or metal ion coordination at guanine’s Hoogsteen edge or do not take part in higher-order interactions (27).

The importance of  $Mg^{2+}$  in tRNA folding has been known for a long time (37–39), and recent studies (40,41) have also highlighted its role in stabilizing essentially all large RNAs, including transition states of some ribozymes (42,43). Several recent theoretical studies have focused on understanding the  $Mg^{2+}$  binding architecture and its exact role in RNA’s structure and function (44–48). However, proper care should be exercised while drawing conclusions based on these studies, as the difference in electron density maps alone cannot distinguish between  $Na^+$ ,  $H_2O$ , and  $Mg^{2+}$  (44). For example, a very recent article by Leonarski et al. (49) has suggested that  $Mg^{2+}$  ions assigned near imino nitrogens are often suspect. The results of that study, in conjunction with an earlier report by Zheng et al. (44) on magnesium-binding architectures in RNA crystal structures, suggest that  $Mg^{2+}$  coordination with nucleobases takes place via different binding modes in RNA. At the same time, among all the nucleobase atoms, the propensity of  $Mg^{2+}$  binding is significantly high for O6 of guanine (44,49). Further, water molecules in the first coordination shell of  $Mg^{2+}$  are highly polarized and have specific roles in mediating  $Mg^{2+}$ -RNA interactions (44,50). We have already said that charge redistribution in guanine caused by protonation at N7 can stabilize the RWC geometry of G:C W:W *Trans* pairs. In principle, interaction of the highly acidic first-shell water molecules ( $pK_a$  of  $Mg^{2+}(H_2O)_6 = 11.4$ ,  $pK_a$  of  $Na^+(H_2O)_{6-8} = 14.4$ ,  $pK_a$  of  $H_2O_{bulk} = 15.7$  (51)) with N7 of guanine should cause similar charge redistribution and therefore can act as a stabilizing factor for the RWC geometry.

It may be noted that only  $Mg^{2+}$  binding to the N7 of guanine has been studied in the context of the G:C W:W *Trans* geometry. Therefore, it is necessary to investigate the effect of other binding modes of  $Mg^{2+}$  with the Hoogsteen edge of

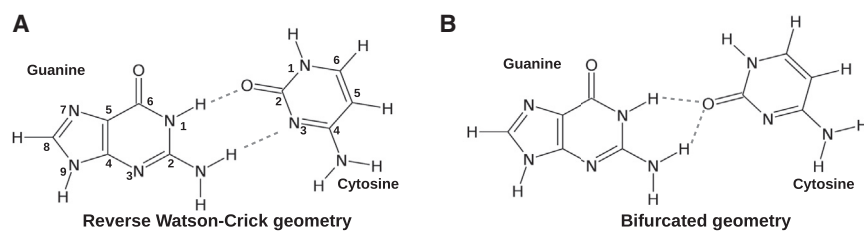

FIGURE 1 Schematic representation of the (A) RWC and (B) bifurcated geometries of the Levitt basepair. Hydrogen bonds are shown as dashed lines.

guanine and understand their influence on G:C W:W Trans basepairing. In this work, we have analyzed high-resolution crystal structures of RNA to identify instances of G:C W:W Trans pairs in which Mg<sup>2+</sup> interacts with the Hoogsteen edge of guanine via different binding modes, such as 1) direct binding at N7, 2) direct binding at O6, 3) simultaneous binding at both N7 and O6, and 4) interaction via hydrogen bonding with the water molecules of the first coordination shell. We also have presented a molecular-level understanding of the chemistry of such interactions and their impact on the geometry and stability of G:C W:W Trans basepairs on the basis of density functional theory (DFT) calculations.

## MATERIALS AND METHODS

We have curated all the RNA x-ray crystal structures (a total of 1873 structures) that have a resolution of <3.5 Å and are available in the Protein Data Bank (PDB) server in September, 2015. We have also curated all the solution NMR structures containing RNA fragments (a total of 591 structures) available in the PDB server in September, 2015. We will refer to this set of 2464 structures as the “large data set” in the following text. To have an unbiased statistics of structural features, we have also considered two nonredundant sets of RNA crystal structures. One is provided by the Nucleic Acid Database (NDB) (52) and the other is provided by the HD-RNAS (53). We have applied a resolution cutoff of 3.5 Å and shortlisted 838 structures available in version 1.89 of the NDB database. This set of 838 structures will be referred to as the “NDB data set” in this article. The representative structures present in HD-RNAS are decided upon after taking into account length, R-factor, resolution, and sequence similarity. We have further shortlisted 167 RNA crystal structures after applying a resolution cutoff of 3.5 Å and length cutoff of 30 nucleotides to exclude the small synthetic RNA constructs. We will refer to this set of 167 structures as the “HD-RNAS data set.” All the PDB identities of the crystal structures of the corresponding data sets are listed in the [Supporting Material](#).

For a given RNA crystal structure, first we have shortlisted all the guanine residues that have one or more Mg<sup>2+</sup> ions within 6.5 Å of their respective Hoogsteen edge carbonyl oxygen (O6) and/or imino nitrogen (N7) atoms. These shortlisted Mg<sup>2+</sup>-nucleobase pairs can further be categorized into two classes depending on the mode of interaction between Mg<sup>2+</sup> and nucleobase atoms (O6/N7): 1) direct interaction, or 2) water-mediated interaction. We have taken the ideal bond lengths of Mg-O and Mg-N bonds as 2.08 and 2.20 Å, respectively. These are the mean distances observed in the Cambridge Structural Database (54) and are also considered in earlier literature (44). With a buffer length of 0.5 Å, if the Mg-O6 distance is found to be ≤ 2.70 Å and/or the Mg-N7 distance is found to be ≤ 2.58 Å, we have considered the corresponding Mg<sup>2+</sup>-nucleobase interaction as a direct interaction. On the other hand, we have considered it to be a water-mediated interaction if a water molecule (O<sub>w</sub>) is found between the Mg<sup>2+</sup> and the nucleobase atom in such a way that 1) it is directly bound to Mg<sup>2+</sup> (i.e., the Mg<sup>2+</sup>-O<sub>w</sub> distance is ≤ 2.70 Å), and 2) there is a possibility of a hydrogen-bonding interaction between the water molecule and the nucleobase atom, i.e., the O<sub>w</sub>-O6/N7 distance is ≤ 3.8 Å, a reasonable cutoff for the hydrogen-bond donor-acceptor distance for biological systems (55,56). This algorithm is pictorially depicted in [Fig. S1](#).

Next, we analyzed the given RNA crystal structure with the BPFIND software (57) and identified whether or not the Mg<sup>2+</sup>-bound nucleobases are part of any G:C W:W Trans-type basepairing interaction. BPFIND is a well-accepted (58–60) precursor atom-based algorithm that identifies two nucleobases as a basepair if there are at least two conventional hydrogen bonds (N-H⋯N, N-H⋯O, O-H⋯N, O-H⋯O, C-H⋯N, or

C-H⋯O) present between them. We have applied the following cutoffs to detect only “good” basepairing interactions: 1) a cutoff distance of 3.8 Å between the acceptor and donor atoms; 2) a cutoff angle of 120.0° for checking planarity of precursor atoms and linearity of the hydrogen bonds; and 3) a cutoff “E-value” of 1.8 to signify the overall distortion and maintain a good basepairing geometry.

We have extracted the coordinates of nucleobases and Mg atoms from the crystal structures and modeled the Mg<sup>2+</sup> coordinated G:C W:W Trans basepairs by adding hydrogen atoms and waters (at the first coordination shell of Mg<sup>2+</sup>) manually using GaussView (61) software. As per common practice (62), we have substituted the sugar moiety by a methyl group to reduce the computational cost without compromising the accuracy of the results. All the basepairs and the corresponding monomers are geometry optimized at six different DFT functionals. The first one is B3LYP (63–65), as it is arguably the most popular hybrid GGA functional (20% HF exchange) implemented in studying basepairing systems (25,66–68). Its long-range-corrected version, CAM-B3LYP (69), and its dispersion-corrected version, B3LYP-D3(BJ), have also been considered. In B3LYP-D3(BJ), the dispersion correction has been added explicitly by Grimme’s method (third order) with Becke-Johnson damping (70,71). Another hybrid GGA functional used in this work is PBE0 (72) (25% Hartree-Fock (HF) exchange), where all the parameters (except those in the underlying local spin-density approximation) are physical constants. PBE0 has been successfully implemented earlier in studying various hydrogen bonded systems including metal-basepair interactions (73,74). Apart from these four hybrid-GGA functionals, we have selected two hybrid meta-GGA functionals, M05-2X (75) (52% HF exchange) and M06-2X (76) (54% HF exchange). They are specially parameterized to consider dispersion interactions and are used regularly in the literature to study similar systems (77–83). Hessian calculations were performed for all the optimized geometries to confirm that they are not associated with any imaginary frequencies.

Interaction energy of these systems (at the DFT level) has been calculated as  $E_{\text{DFT}}^{\text{int}} = E(\text{Mg}^{2+}\text{-bound basepair}) - E(\text{Mg}^{2+}\text{-bound guanine}) - E(\text{cytosine}) + \text{BSSE}$ , where  $E(X)$  represents the electronic energy corresponding to the optimized geometry of isolated X and the basis-set superposition error (BSSE) is calculated using the counterpoise method (84). All the DFT calculations have been performed using the 6-311++G(d,p) basis set for Mg and the 6-31++G(2d,2p) basis set for other atoms (85). We have verified that at the B3LYP level, the optimized geometries and their corresponding interaction energies obtained with this choice of basis-set combination is consistent with that obtained with a split-valance triple- $\zeta$  basis augmented with 1) one set of a d-type and one set of a p-type polarization function for all nonhydrogen atoms, and 2) one set of a p-type and one set of a d-type polarization function for hydrogen atoms, also including s-p diffused orbitals for nonhydrogen atoms, i.e., 6-311++G(2df,2pd) (Figs. S4 and S5). Our choice of basis sets, therefore, reduces the computational cost without compromising reliability. For the B3LYP-optimized geometries we have also calculated the BSSE-corrected interaction energy at the MP2 level and denoted it as  $E^{\text{int}}$ . Further, we have studied the solvent screening of the electrostatic component of the interaction energy using the conductor-like polarizable continuum model (CPCM) (86,87), with water as solvent ( $\epsilon = 78.4$ ), and denoted it as  $E_{\text{sol}}^{\text{int}}$ . Note that CPCM uses the united-atom topological model to define the atomic radii and is found to be appropriate for polar liquids (88). All MP2 calculations have been performed using the aug-cc-pVTZ basis set for Mg and the aug-cc-pVDZ basis set for other atoms (89). Kitaura-Morokuma decomposition analysis (90) was performed using the GAMESS-US package (91) to study the partitioning of the two-body intermolecular interaction energies into electrostatic, polarization, charge transfer, and higher-order coupling terms, within the HF approximation. To study the charge distribution of a system, we have performed Natural Population Analysis (92,93) using the NBO package (94) implemented in the Gaussian 09 package. All other QM calculations are also done using the Gaussian 09 package (95).

NUPARM package (96,97) has been used to characterize the geometry of optimized basepairs on the basis of three translational (shear, stretch, and

stagger) and three rotational (buckle, propeller twist, and opening) parameters. Structural alignment was performed using VMD (98). We have developed a Python-based program to detect  $Mg^{2+}$ -coordinated basepairs in RNA crystal structures.

## RESULTS AND DISCUSSION

### Context analysis of G:C W:W Trans basepairs in RNA crystal structures

Two nonredundant data sets of RNA crystal structures analyzed in this work, HD-RNAS and NDB, contain 116 and 86 instances of G:C W:W Trans, respectively. However, a total number of 2101 instances of G:C W:W Trans have been detected in the large set of RNA crystal structures. We have analyzed the context of occurrence of these instances and found that G:C W:W Trans occurs in 14 different contexts, of which eight show  $Mg^{2+}$  coordination at the Hoogsteen edge of guanine (Table 1). Apart from the well-studied Levitt pair (context 1),  $Mg^{2+}$  coordinated G:C W:W Trans is observed in 23S rRNA of *Escherichia coli* (context 2d and context 10), 23S rRNA of *Thermus thermophilus* (context 4b, context 5), 23S rRNA of *Haloarcula marismortui* (context 3c), 23S rRNA (context 2e) and

5.8S rRNA (context 13) of *Saccharomyces cerevisiae*. A detailed picture of the occurrence contexts is given in the Supporting Material (Fig. S2), which shows that  $Mg^{2+}$  coordinated G:C W:W Trans pairs are involved in various structural motifs such as kissing loop, internal loop, junction loop, and also in mediating loop-loop interactions.

Analysis of the 2101 total instances of G:C W:W Trans basepairs shows that 36.2% (760 instances) have at least one  $Mg^{2+}$  within 6.5 Å of N7 and/or O6. This abundance of  $Mg^{2+}$  near G:C W:W Trans is remarkable, as the percentage is even higher than that for the Hoogsteen edge of canonical G:C W:W *Cis* pairs (32.2%). Among these 760 instances, the  $Mg^{2+}$  is found 242 times within 6.5 Å of N7, 62 times within 6.5 Å of O6, and 456 times within 6.5 Å of both N7 and O6. Thus, G:C W:W Trans pairs that have a  $Mg^{2+}$  within 6.5 Å of N7 (Fig. 2 A) is significantly greater than that for O6 (Fig. 2 B). Interestingly, however, the relative propensity of occurrences of  $Mg^{2+}$  within 3.0 Å of the base atom (i.e., close to the Mg-O/Mg-N covalent bond length) is remarkably higher for the O6 instances than for the N7 instances. In contrast, the frequency distribution of Mg-N7 distances has a high population at larger values (~4.5 and ~5.7 Å). These observations suggest a

**TABLE 1** Context of Occurrence of G:C W:W Trans Basepair in the Large Set of RNA Crystal Structures

| Context | RNA Type     | Species                        | Basepair                           | $Mg^{2+}$ Coordination | Occ. Freq | <i>E</i> Value |      | Context of Occurrence                                                   |
|---------|--------------|--------------------------------|------------------------------------|------------------------|-----------|----------------|------|-------------------------------------------------------------------------|
|         |              |                                |                                    |                        |           | $\bar{E}$      | SD   |                                                                         |
| 1.      | tRNA         | various species                | 15G:48C                            | yes                    | 396       | 0.67           | 0.34 | Levitt basepair                                                         |
| 2.      | (a) 23S rRNA | <i>Deinococcus radiodurans</i> | 2508G:2454C                        |                        | 15        | 1.01           | 0.55 | kissing loop in domain V                                                |
|         | (b) 23S rRNA | <i>T. thermophilus</i>         | 2541G:2487C                        |                        | 19        | 0.64           | 0.24 |                                                                         |
|         | (c) 23S rRNA | <i>H. marismortui</i>          | 2564G:2510C                        |                        | 65        | 0.90           | 0.27 |                                                                         |
|         | (d) 23S rRNA | <i>E. coli</i>                 | 2529G:2475C                        | yes                    | 177       | 0.77           | 0.32 |                                                                         |
|         | (e) 25S rRNA | <i>S. cerevisiae</i>           | 2898G:2844C                        | yes                    | 34        | 0.55           | 0.15 |                                                                         |
| 3.      | (a) 23S rRNA | <i>D. radiodurans</i>          | 1809G:1791C                        |                        | 7         | 0.89           | 0.21 | internal loop in domain IV                                              |
|         | (b) 23S rRNA | <i>T. thermophilus</i>         | 1817G:1800C                        |                        | 209       | 0.80           | 0.17 |                                                                         |
|         | (c) 23S rRNA | <i>H. marismortui</i>          | 1873G:1856C                        | yes                    | 65        | 0.54           | 0.10 |                                                                         |
| 4.      | (a) 23S rRNA | <i>D. radiodurans</i>          | 2484G:2589C                        |                        | 7         | 0.86           | 0.28 | 5-way junction loop in domain V                                         |
|         | (b) 23S rRNA | <i>T. thermophilus</i>         | (a) 2505G:2610C                    | yes                    | 199       | 0.73           | 0.25 | 5-way junction loop connecting domain 0 and domain V                    |
|         |              |                                | (b) 2517G:2622C                    |                        | 22        | 0.62           | 0.13 |                                                                         |
| 5.      | 23S rRNA     | <i>T. thermophilus</i>         | 1271G:1615C                        | yes                    | 212       | 0.62           | 0.20 | connecting a junction loop (gua) and a hairpin loop (cyt) in domain III |
| 6.      | 23S rRNA     | <i>T. thermophilus</i>         | (a) 1929G:1925C<br>(b) 1951G:1947C |                        | 205       | 0.50           | 0.20 | 4-way junction loop in domain IV                                        |
| 7.      | 23S rRNA     | <i>T. thermophilus</i>         | 430G:234C                          |                        | 173       | 0.45           | 0.14 | connecting two junction loops in domain I                               |
| 8.      | (a) 23S rRNA | <i>H. marismortui</i>          | 1190G:1186C                        |                        | 60        | 0.83           | 0.26 | 3-way junction loop in domain II                                        |
|         | (b) 25S rRNA | <i>S. cerevisiae</i>           | 1261G:1257C                        |                        | 34        | 0.58           | 0.36 |                                                                         |
| 9.      | 23S rRNA     | <i>H. marismortui</i>          | 1683G:1377C                        |                        | 65        | 0.36           | 0.09 | connecting 2 junction loops within domain III                           |
| 10.     | 23S rRNA     | <i>E. coli</i>                 | 1360G:2214C                        | yes                    | 53        | 0.92           | 0.33 | kissing loop interaction connecting domain III and domain V             |
| 11.     | (a) 23S rRNA | <i>D. radiodurans</i>          | 1284G:1631C                        |                        | 20        | 0.92           | 0.34 | helix-helix interaction between domain III (gua) and domain 0 (cyt)     |
|         | (b) 23S rRNA | <i>T. thermophilus</i>         | 1318G:1662C                        |                        | 20        | 0.56           | 0.11 |                                                                         |
| 12.     | 23S rRNA     | <i>T. thermophilus</i>         | 1847G:1830C                        |                        | 20        | 0.69           | 0.11 | bulge-helix interaction in domain IV                                    |
| 13.     | 5.8S rRNA    | <i>S. cerevisiae</i>           | 39G:106C                           | yes                    | 17        | 1.00           | 0.11 | loop-loop interaction (a part of bifurcated triple)                     |
| 14.     | 18S rRNA     | <i>S. cerevisiae</i>           | 720G:717C                          |                        | 7         | 1.60           | 0.20 | hairpin loop in domain C                                                |

Average ( $\bar{E}$ ) and standard deviation (SD) of the *E*-value (calculated by BPFIND software) have been reported for each context. Occ. Freq., frequency of occurrence.

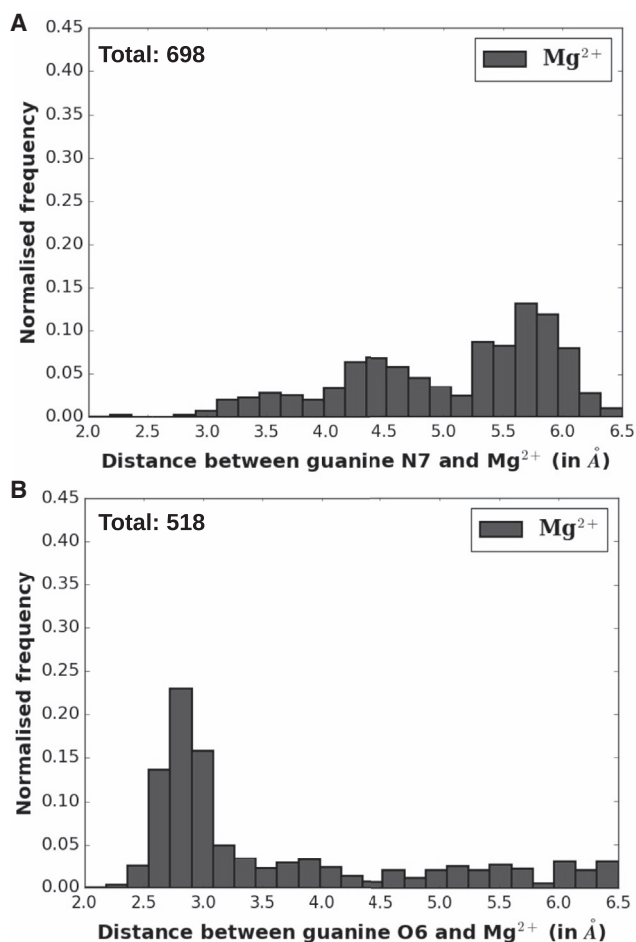

FIGURE 2 Distribution of the occurrence frequency (normalized) of G:C W:W Trans pairs that have at least one Mg<sup>2+</sup> within 6.5 Å of the nucleobase atom (N7/O6) with respect to (A) the N7-Mg<sup>2+</sup> distance and (B) the O6-Mg<sup>2+</sup> distance.

distinct preference for the direct coordination mode of Mg<sup>2+</sup> binding for O6, whereas for N7, the preference seems to be strongly tilted toward water-mediated Mg<sup>2+</sup> binding. To understand the implications of these new modes of Mg<sup>2+</sup> binding to G:C W:W Trans basepairs, we have tried to detect all related instances in our RNA structure data sets.

As seen above, our search space consists of the 760 instances involving Mg<sup>2+</sup> detected within 6.5 Å of N7 and/or O6. Notably, definitive assignment of the two modes, based on interatomic distances and available coordinates of water, was possible for only ~18% of the search space. This consisted of only one instance of direct Mg<sup>2+</sup> binding at N7, 23 instances of direct Mg<sup>2+</sup> binding at O6, and 112 instances of Mg<sup>2+</sup> binding via the water molecules of the first coordination shell. To assess the tightness of direct and water-mediated Mg<sup>2+</sup> binding in the two locations, we looked at their B-factors for these 136 instances. Although all the values were in general found to be on the higher side, they showed an interesting variation pattern. B-factors were higher for both the binding modes (direct and water mediated) when

associated with N7 (average values are 68.6 and 78.5, respectively) than when associated with O6 (average values are 38.5 and 41.3, respectively), with the intermode variation also being higher for N7 instances than for O6 instances. We have also characterized the geometry of these Mg<sup>2+</sup>-bound G:C W:W Trans pairs by the three translational (shear, stretch, and stagger) and three rotational (buckle, propeller twist, and opening) parameters, as shown in Fig. 3 A. Distribution of these instances in the buckle-propeller-twist space (Fig. 3 B) shows that water-mediated Mg<sup>2+</sup> binding at the Hoogsteen edge of guanine (*green circles*) and direct Mg<sup>2+</sup> binding at O6 (*blue circles*) are usually associated with a nonplanar geometry characterized by high buckle and/or propeller-twist values. On the other hand, direct Mg<sup>2+</sup> binding at N7 is associated with a relatively planar geometry (*red circles*). Distribution in the buckle-open (Fig. 3 C) and open-propeller-twist (Fig. 3 D) spaces shows no significant variation in the opening angle. However, data points corresponding to the water-mediated Mg<sup>2+</sup> binding (*green circles*) and direct Mg<sup>2+</sup> binding at O6 (*blue circles*) are distinctly clustered at the high buckle and propeller-twist values (both positive and negative) in Fig. 3, C and D, respectively. The planar geometry of G:C W:W Trans corresponding to direct Mg<sup>2+</sup> binding at N7 is consistent with the optimized geometries reported in earlier QM-based studies (23,24). Can the nonplanar geometries corresponding to the new Mg<sup>2+</sup>-binding modes also be explained on the basis of their ground-state electronic structures?

### Influence of Mg<sup>2+</sup> coordination on the geometry and charge distribution of guanine

Apart from the three different Mg<sup>2+</sup>-binding modes observed in crystal structures (i.e., 1) direct Mg<sup>2+</sup> binding at N7, 2) direct Mg<sup>2+</sup> binding at O6, and 3) Mg<sup>2+</sup> binding via first-shell water molecules), we have modeled one more mode of interaction: 4) direct binding of Mg<sup>2+</sup> with both N7 and O6 simultaneously. The optimized geometry (at B3LYP) of Mg<sup>2+</sup>-bound guanine corresponding to these four different binding modes is shown in Fig. 4. Comparison with the optimized geometry of normal guanine (Fig. 4 A) reveals that the major change in the geometry takes place at the exocyclic amino group. In all four cases (Fig. 4, C–F), the change is characterized by depyramidalization of the amino group and shortening of the C2-N2 bond, which is indicative of a sp<sup>3</sup> → sp<sup>2</sup> transition of N2's hybridization state. This can be explained by the conjugation of the lone pair of the exocyclic amino group with the ring π system (Fig. 4 G). As discussed earlier for guanine N7 protonation (27), positive charge buildup at the Hoogsteen edge of guanine favors such charge delocalization by stabilizing the resonance canonical structure labeled (ii) in Fig. 4 G. Such Mg<sup>2+</sup>-binding-induced charge delocalization is also reflected in the reduced HOMO-LUMO gaps ( $\Delta E_{\text{H-L}}$ ) in Mg<sup>2+</sup>-bound systems. For example, at the B3LYP level,  $\Delta E_{\text{H-L}} = 5.1$  eV for normal

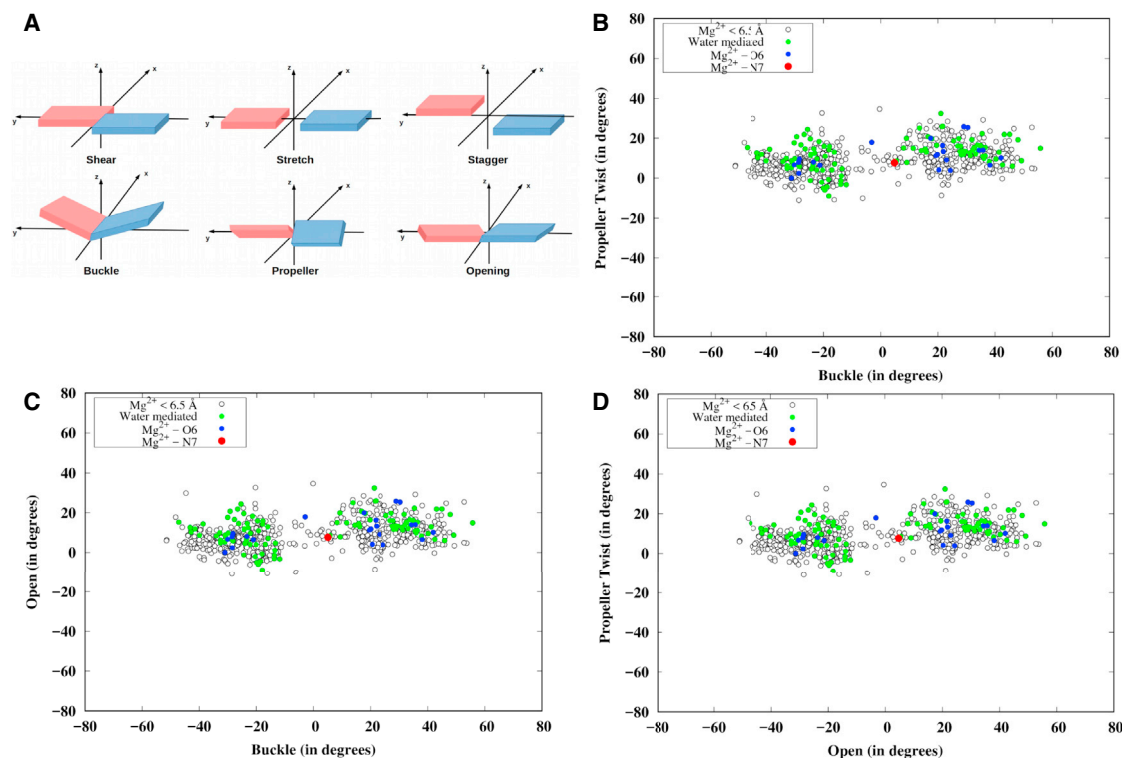

FIGURE 3 (A) Definition of the three translational (shear, stretch, and stagger) and three rotational (buckle, propeller twist, and opening) parameters that define the mutual orientation of the two bases in a basepair. The distribution of all instances of G:C W:W Trans basepair detected in the larger set of RNA crystal structures having at least one Mg atom within 6.5 Å of N7 and/or O6 is shown for the (B) buckle-propeller-twist, (C) buckle-open, and (D) open-propeller-twist spaces. Solid circles represent the instances for which the exact binding mode of  $\text{Mg}^{2+}$  (red, direct coordination at N7; blue, direct coordination at O6; green, coordination via first-shell water molecules) can be identified in the crystal structures. Open circles represent instances where  $\text{Mg}^{2+}$  is present within 6.5 Å of N7/O6, but the exact binding mode cannot be identified. To see this figure in color, go online.

guanine; 4.9 eV for direct  $\text{Mg}^{2+}$  binding at N7, O6, or both; and 4.8 eV for water-mediated  $\text{Mg}^{2+}$  binding.

$\text{Mg}^{2+}$ -induced charge redistribution modulates the hydrogen-bonding potential of the hydrogen bond donor and acceptor sites of the Watson-Crick edge. On the basis of the NBO charges ( $q$ ) shown in Fig. 4, it is evident that both N7 protonation and  $\text{Mg}^{2+}$  coordination reduce the electron density over the hydrogen bond donor sites (N1 and N2) and thus improve their hydrogen-bonding potential. To quantify this variation, let us introduce the parameter  $\Delta q = q(\text{Mg}^{2+} \text{ coordinate guanine}) - q(\text{normal guanine})$ .  $\Delta q$  corresponding to N1 and N2 is similar for all four  $\text{Mg}^{2+}$  binding modes. However, the change in the hydrogen bond acceptor site (O6) is the opposite for N7 protonation and  $\text{Mg}^{2+}$  interaction. Across all four binding modes studied,  $\text{Mg}^{2+}$  interaction increases the electron density over O6, making it a stronger hydrogen bond acceptor. Interestingly, the four binding modes can be classified into two groups on the basis of their corresponding  $\Delta q$  values: group I, consisting of direct binding at N7 and at both N7 and O6 ( $\Delta q = 0.135$  and  $0.137$  e, respectively (Fig. 4, C and E)); and group II, consisting of direct binding at O6 and water-mediated binding ( $\Delta q = 0.179$  and  $0.178$  e, respectively (Fig. 4, D and F)). The same grouping is also valid for the extent of

decrease in electron density over the hydrogen atoms of the Watson-Crick edge (Table S1). It is noteworthy that earlier works have considered the decrease in electron density over the amino hydrogens to be the key factor responsible for the stabilization of the RWC geometry on  $\text{Mg}^{2+}$  coordination, since it reduces the electrostatic repulsion between amino groups of guanine and cytosine (23). Therefore, on the basis of  $\text{Mg}^{2+}$ -induced charge redistribution, we can expect that the influence of  $\text{Mg}^{2+}$  coordination on the G:C W:W Trans basepairing will be different for the two sets of conditions mentioned above, Group I and Group II.

An important observation is that stability of the hydrated  $\text{Mg}^{2+}$ -guanine complex is highly dependent on the binding mode (Fig. 4, C–F). Water-mediated  $\text{Mg}^{2+}$  interaction is significantly stronger ( $E_{\text{bind}} = -70.2$  kcal/mol) than any direct  $\text{Mg}^{2+}$  interaction mode. Due to restriction in the formation of the octahedral geometry, direct  $\text{Mg}^{2+}$  binding at both N7 and O6 ( $E_{\text{bind}} = -31.8$  kcal/mol) is significantly weaker than for direct  $\text{Mg}^{2+}$  binding at N7 ( $E_{\text{bind}} = -51.0$  kcal/mol) and O6 ( $E_{\text{bind}} = -53.9$  kcal/mol). Here,  $E_{\text{bind}}$  for a ( $\text{Mg}^{2+}$ ,  $n\text{H}_2\text{O}$ )-bound guanine has been calculated as  $E_{\text{bind}} = E(\text{guanine bound to } \text{Mg}^{2+}, n\text{H}_2\text{O}) + (6 - n)E(\text{H}_2\text{O}) - E(\text{Mg}^{2+}, 6\text{H}_2\text{O}) - E(\text{guanine})$ , where  $E(X)$  corresponds to the ground state electronic energy of the species X.

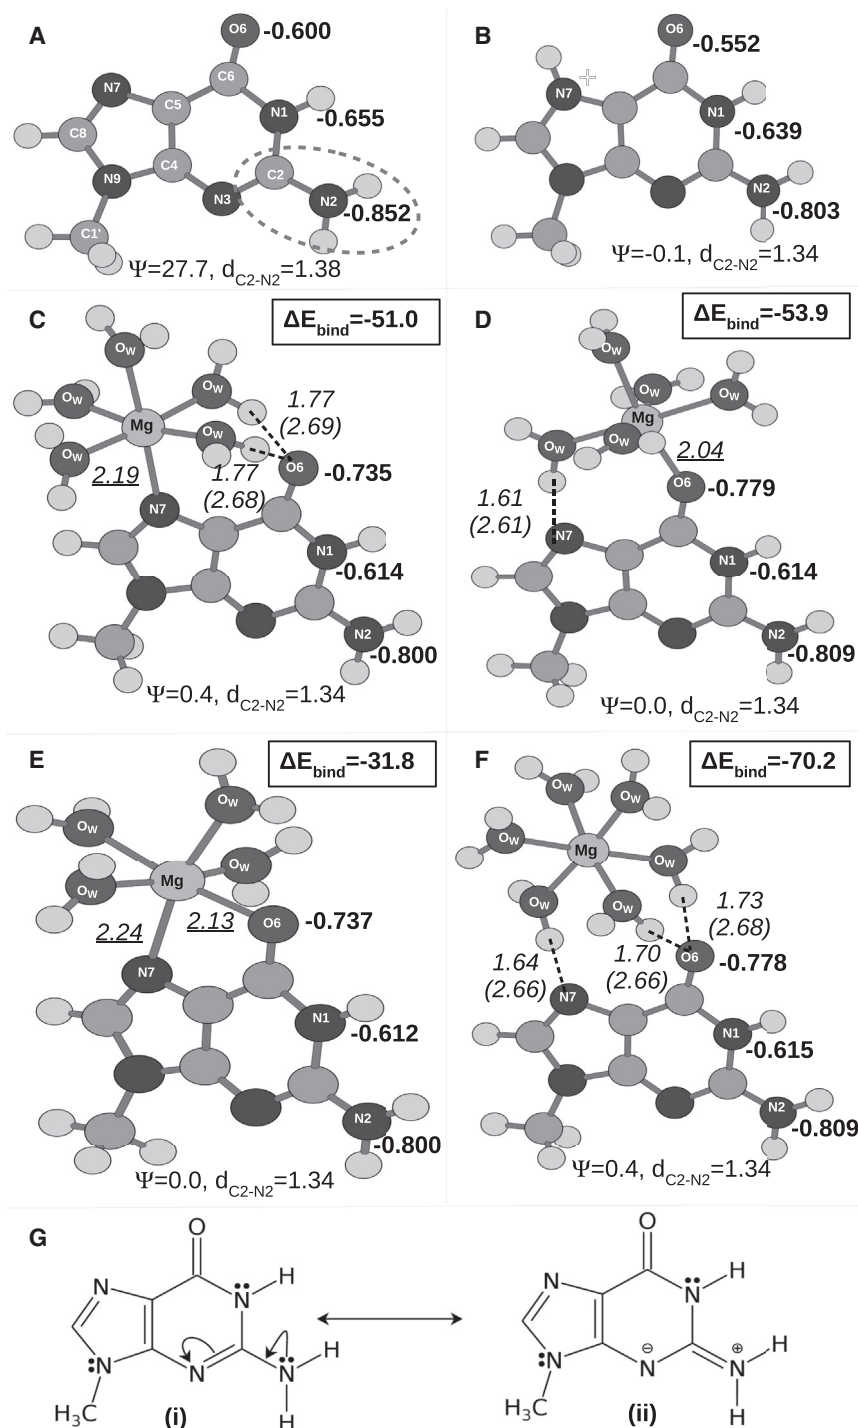

FIGURE 4 B3LYP optimized geometries of (A) normal guanine; (B) N7 protonated guanine; guanine with (C) direct Mg<sup>2+</sup> binding at N7, (D) direct Mg<sup>2+</sup> binding at O6, and (E) direct Mg<sup>2+</sup> binding at both N7 and O6; and (F) Mg<sup>2+</sup> binding at the Hoogsteen edge via the water molecules of its first coordination shell. The improper dihedral angle  $\psi$  measures the extent of pyramidalization of the amino group (see Fig. S3).  $d_{C2-N2}$  represents the C2-N2 bond length. Hydrogen bonds are shown as dashed lines. For each hydrogen bond, the distance between hydrogen and the acceptor atom is reported in *italic*. Values in parentheses represent the distance between the hydrogen bond donor and acceptor atoms. Mg-N7/O6 distances are underlined. All interatomic distances are reported in Ångströms. Partial charges obtained from natural population analysis are reported (as a fraction of elemental charge (*e*)) for the hydrogen bond donor and acceptor atoms of the Watson-Crick edge (*bold*).  $\Delta E_{\text{bind}}$  represents the binding energy (in kcal/mol, at the MP2 level) between the hydrated Mg<sup>2+</sup> ion and guanine. (G) Conjugation of the lone pair of the exocyclic amino group with the ring  $\pi$  system is shown.

### Influence of different Mg<sup>2+</sup> coordination modes on the geometry and stability of G:C W:W Trans pairs

From the B3LYP-level optimized geometries shown in Fig. 5, it is clear that the RWC geometry of the G:C W:W *trans* pair is not favorable in the gas phase and converges to a bifurcated geometry on energy optimization (Fig. 5 A).

Positive charge buildup at the Hoogsteen edge of guanine in the form of direct N7 protonation (Fig. 5 B), direct Mg<sup>2+</sup> binding (Fig. 5 C–E), or water-mediated Mg<sup>2+</sup> interaction (Fig. 5 F) stabilizes the RWC geometry. Fig. 5 also shows the BSSE-corrected interaction energy calculated at the MP2 level for the B3LYP optimized geometries. In general, the gas-phase interaction energy of these positively

charged systems is dominated by the electrostatic component (the HF component of  $E_{MP2}^{int}$  is  $>74\%$  for all the systems, Table S2). We have therefore incorporated the effect of solvent screening on the interaction energy ( $E_{sol}^{int}$ ) of the gas-phase optimized geometries. The  $E_{sol}^{int}$  values shown in Fig. 5 suggest that the RWC geometry stabilized by positive charge buildup at the Hoogsteen edge is 3.3–6.6 kcal/mol stabler than for the bifurcated geometry. Among the three direct  $Mg^{2+}$ -binding modes, direct binding at O6 results in the strongest pair ( $E^{int} = -43.0$  kcal/mol and

$E_{sol}^{int} = -16.1$  kcal/mol), probably due to the extra hydrogen bond between one first-shell water and the O2 of cytosine. However, the interaction energy of G:C W:W Trans with water-mediated  $Mg^{2+}$  binding is lower than all three direct  $Mg^{2+}$  coordinated models. This relative order of stability of the G:C W:W Trans pairs corresponding to the four  $Mg^{2+}$ -binding modes is consistent with the interaction energies calculated at all different DFT functionals except B3LYP-D3(BJ), where the dispersion interactions have been treated as an empirical correction term ( $E_{DFT}^{int}$  in

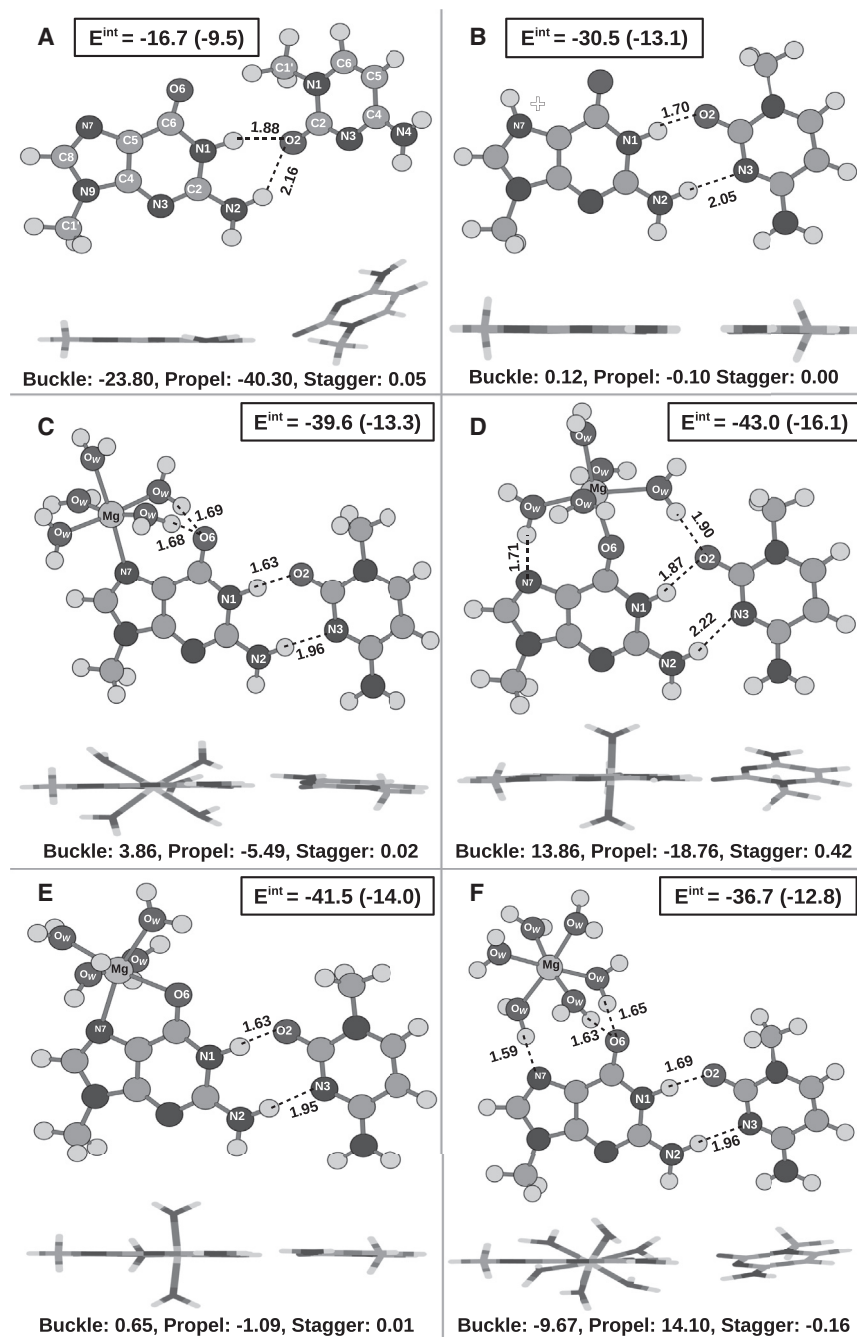

FIGURE 5 B3LYP optimized geometries of G:C W:W Trans pairs with (A) normal guanine, (B) N7 protonated guanine, and (C–F)  $Mg^{2+}$ -bound guanine are shown. Different modes of  $Mg^{2+}$  binding are direct  $Mg^{2+}$  binding at (C) only N7, (D) only O6, and (E) both N7 and O6, and (F) binding via the water molecules of the first coordination shell. For each case, a lateral view of the optimized structure is also shown to highlight the extent of nonplanarity of the interaction. The same has been quantified by the buckle, propeller-twist, and stagger parameters. Hydrogen bonds are represented by dashed lines labeled with the distances (Å) between the hydrogen and the acceptor atom. BSSE-corrected interaction energies ( $E^{int}$ ) calculated at the MP2 level have been reported in kcal/mol.  $E^{int}$  values calculated in the CPCM continuum solvent model are given in parentheses.



**TABLE 2** Basepair Geometry Parameters Corresponding to the Optimized Geometries of the G:C W:W Trans Basepair

|                                                 | $E_{\text{DFT}}^{\text{int}}$ | Buckle  | Open  | Propel | Stagger | Shear | Stretch |
|-------------------------------------------------|-------------------------------|---------|-------|--------|---------|-------|---------|
| Normal Guanine                                  |                               |         |       |        |         |       |         |
| B3LYP                                           | -14.7                         | -23.80  | 74.21 | -40.30 | 0.05    | -3.61 | 3.17    |
| CAM-B3LYP                                       | -17.2                         | 21.87   | 74.87 | 38.73  | -0.03   | -3.63 | 3.13    |
| B3LYP-D3(BJ)                                    | -37.6                         | -156.68 | 15.64 | -73.43 | 0.39    | -1.27 | 2.90    |
| PBE0                                            | -16.0                         | -27.86  | 73.99 | -42.54 | 0.05    | -3.51 | 3.12    |
| M05-2X                                          | -17.7                         | -5.27   | 76.55 | -4.35  | 0.23    | -4.11 | 3.07    |
| M06-2X                                          | -17.5                         | -11.16  | 78.12 | -5.21  | 0.32    | -4.13 | 3.04    |
| Direct Protonation at N7                        |                               |         |       |        |         |       |         |
| B3LYP                                           | -28.6                         | 0.12    | 12.47 | -0.10  | 0.00    | -2.78 | 2.88    |
| CAM-B3LYP                                       | -30.4                         | 0.28    | 12.79 | -0.61  | 0.00    | -2.80 | 2.86    |
| B3LYP-D3(BJ)                                    | -51.9                         | 4.38    | 10.00 | -16.16 | 0.03    | -2.62 | 2.82    |
| PBE0                                            | -30.1                         | 1.87    | 12.25 | -3.83  | 0.01    | -2.73 | 2.85    |
| M05-2X                                          | -30.8                         | -0.35   | 19.36 | -0.23  | 0.00    | -3.43 | 2.84    |
| M06-2X                                          | -30.4                         | -0.06   | 14.54 | 0.15   | 0.00    | -3.10 | 2.84    |
| Direct Mg <sup>2+</sup> Coordination at N7      |                               |         |       |        |         |       |         |
| B3LYP                                           | -32.3                         | 3.86    | 12.70 | -5.49  | 0.02    | -2.64 | 2.85    |
| CAM-B3LYP                                       | -34.3                         | 4.00    | 12.96 | -5.77  | 0.02    | -2.64 | 2.83    |
| B3LYP-D3(BJ)                                    | -73.9                         | 4.44    | 11.42 | -6.90  | 0.03    | -2.55 | 2.82    |
| PBE0                                            | -35.4                         | 6.36    | 12.52 | -9.70  | 0.05    | -2.58 | 2.82    |
| M05-2X                                          | -33.6                         | 5.60    | 14.74 | -9.12  | 0.05    | -2.70 | 2.85    |
| M06-2X                                          | -34.6                         | 11.82   | 12.88 | -21.64 | 0.11    | -2.56 | 2.80    |
| Direct Mg <sup>2+</sup> Coordination at O6      |                               |         |       |        |         |       |         |
| B3LYP                                           | -34.1                         | 13.86   | 11.55 | -18.76 | 0.42    | -1.8  | 3.03    |
| CAM-B3LYP                                       | -37.0                         | 12.47   | 11.76 | -18.34 | 0.36    | -1.73 | 3.01    |
| B3LYP-D3(BJ)                                    | -29.6                         | 10.83   | 3.39  | -26.18 | 0.17    | -2.18 | 2.89    |
| PBE0                                            | -37.0                         | 13.11   | 11.63 | -19.06 | 0.35    | -1.76 | 2.99    |
| M05-2X                                          | -39.8                         | 61.96   | -3.4  | -34.79 | 0.74    | -0.19 | 2.96    |
| M06-2X                                          | -39.9                         | 15.86   | 3.88  | -37.43 | 0       | -0.53 | 2.89    |
| Mg <sup>2+</sup> Coordination at Both N7 and O6 |                               |         |       |        |         |       |         |
| B3LYP                                           | -34.1                         | 0.65    | 8.51  | -1.09  | 0.01    | -2.68 | 2.77    |
| CAM-B3LYP                                       | -36.2                         | 1.45    | 8.84  | -2.33  | 0.02    | -2.68 | 2.75    |
| B3LYP-D3(BJ)                                    | -46.8                         | 10.74   | 6.1   | -17.53 | 0.17    | -2.54 | 2.72    |
| PBE0                                            | -37.1                         | 3.55    | 8.46  | -6.06  | 0.06    | -2.63 | 2.74    |
| M05-2X                                          | -35.7                         | 13.03   | 8.82  | -23.63 | 0.22    | -2.62 | 2.73    |
| M06-2X                                          | -36.8                         | 8.15    | 8.67  | -20.2  | 0.19    | -2.58 | 2.73    |
| Water-Mediated Mg <sup>2+</sup> Coordination    |                               |         |       |        |         |       |         |
| B3LYP                                           | -29.2                         | -9.67   | 10.88 | 14.10  | -0.16   | -2.61 | 2.88    |
| CAM-B3LYP                                       | -31.3                         | -9.51   | 11.29 | 13.74  | -0.15   | -2.61 | 2.86    |
| B3LYP-D3(BJ)                                    | -70.8                         | 9.74    | 9.14  | -17.58 | 0.17    | -2.49 | 2.83    |
| PBE0                                            | -32.3                         | -11.55  | 10.52 | 17.62  | -0.20   | -2.55 | 2.84    |
| M05-2X                                          | -30.8                         | 16.11   | 11.16 | -22.90 | 0.22    | -2.64 | 2.85    |
| M06-2X                                          | -31.8                         | 7.39    | 11.82 | -17.18 | 0.14    | -2.61 | 2.85    |

Parameters were obtained using different DFT functionals for 1) normal, 2) N7 protonated, and (3–6) different modes of Mg<sup>2+</sup> coordination. The BSSE-corrected interaction energy ( $E_{\text{DFT}}^{\text{int}}$ ) values corresponding to the optimized geometries of the basepair are given in kcal/mol.

Fig. S6; Table 2). It is to be noted that optimized geometries of the G:C W:W Trans pair (except in the cases of direct Mg<sup>2+</sup> binding at N7 and water-mediated Mg<sup>2+</sup> binding) obtained at the B3LYP-D3(BJ) level are also not consistent with the other functionals (Table 2). Among the other five functionals, B3LYP-level calculations result in minimal interaction energy. Consideration of the long-range corrections in the CAM-B3LYP functional improves the interaction energy by up to 2.9 kcal/mol (for direct Mg<sup>2+</sup> binding at O6). On the other hand, incorporation of dispersion interactions via a parameterized hybrid meta-GGA functional like M05-2X improves the interaction energy by 1.3 kcal/mol (for direct Mg<sup>2+</sup> binding at N7) to 5.7 kcal/mol (for direct

Mg<sup>2+</sup> binding at O6). For M06-2X, the rise in interaction energies is even higher (up to 1 kcal/mol). However, except in the case of direct Mg<sup>2+</sup> binding at O6, calculations performed at PBE0, the other hybrid GGA functional considered in this work, give the highest interaction energies (Fig. S6) and therefore are closer to the interaction energies calculated at the MP2 level ( $E^{\text{int}}$  values reported in Fig. 5). Our results therefore suggest that dispersion and long-range corrections are crucial for these systems, especially for direct Mg<sup>2+</sup> binding at O6. At the same time, the method of incorporation of the dispersion interactions is also important.

Interestingly, as expected from the Mg<sup>2+</sup>-coordination-induced charge redistribution in guanine, the optimized

geometry of G:C W:W Trans with the Group I-type  $Mg^{2+}$  interaction is significantly different from that with the Group II-type  $Mg^{2+}$  interaction. For the latter group, the optimized geometry is nonplanar, having high buckle and propeller twist (Fig. 5, D and F), whereas the former results in a planar geometry (Fig. 5, C and E) similar to that for guanine N7 protonation (Fig. 5 B). The comparison is clearly depicted in Fig. 6, A and B, where the optimized geometries are structurally aligned with respect to the guanine residue. Optimized geometries corresponding to direct  $Mg^{2+}$  binding at O6 (green) and  $Mg^{2+}$  binding via first-shell water molecules (red) bend out of the plane, whereas optimized geometries corresponding to N7 protonation (blue), direct  $Mg^{2+}$  coordination at N7 (magenta), and direct  $Mg^{2+}$  coordination at both N7 and O6 (yellow) remain planar.

### Nonplanarity of G:C W:W Trans on direct $Mg^{2+}$ binding at O6 and $Mg^{2+}$ binding via first-shell waters

It is important to note that the nonplanarity is inherent and not an artifact of the level of theory, as geometry optimization at all the six DFT functionals results in a buckled and propeller-twisted geometry for direct  $Mg^{2+}$  binding at O6 (case 1) and  $Mg^{2+}$  binding via first-coordination-shell water molecules (case 2) (Table 2). Interbase hydrogen-bonding distances corresponding to case 1 and case 2 are longer than that for the N7 protonated case. This indicates that the buckled and propeller-twisted geometry moves the bases away from each other. Again, for direct  $Mg^{2+}$  coordination at N7 (case 3) (Fig. 5 C) and at both N7 and O6 (case 4) (Fig. 5 E), the optimized geometries remain planar. The interbase hydrogen-bonding distances corresponding to case 3 and case 4 are shorter than that for the N7 protonated case. This indicates that the planar geometry brings the bases close to each other.

Decomposition of the interaction energies (Fig. 6 C) of the B3LYP optimized geometries show that in comparison to N7 protonation (blue bars),  $Mg^{2+}$  binding significantly increases the electrostatic component for all four cases. However, the corresponding charge-transfer components are relatively higher for case 3 (magenta bars) and case 4

(yellow bars). As a result, although the planar geometry of case 3 and case 4 brings the bases closer to each other, the subsequent increase in the exchange repulsion component gets compensated by the charge-transfer component. On the other hand, the charge-transfer component is relatively lower in case 1 (green bars) and case 2 (red bar). Therefore, these two systems tend to attain optimal stability by adopting a buckled and propeller-twisted geometry, which results in movement of the two bases away from each other, thus avoiding any consequent increase of the exchange repulsion component.

Table 2 shows that the optimized geometry corresponding to direct  $Mg^{2+}$  coordination at N7 is nonplanar only at the M06-2X level and can be considered as an outlier. However, optimized geometries corresponding to the two hybrid meta-GGA functionals (M05-2X and M06-2X) show relatively higher buckle and propeller twist for case 1 and case 2. Why do geometry optimizations at M05-2X and M06-2X tend to increase the nonplanarity of these base-pairs? Note that the percentage of HF exchange energy incorporated into M05-2X (52%) and M06-2X (54%) is  $\sim 2$ – $2.7$  times higher than that incorporated into the other two hybrid GGA functionals considered in this study, i.e., B3LYP (20%) and PBE0 (25%). However, understanding the correlation (if any) between the extent of nonplanarity in these systems and the percentage-of-HF-exchange-energy component incorporated into hybrid functionals requires further investigation and is beyond the scope of this work.

### Consistency with the crystal structure

Optimized geometries associated with different  $Mg^{2+}$ -binding modes, and their relative stabilities, are consistent with the corresponding trends observed in RNA crystal structures. As discussed in the previous section, the G:C W:W Trans pairs with  $Mg^{2+}$  binding at O6, both directly and with water mediation, are also associated with a buckled and propeller-twisted geometry in the crystal structure. Note that in the crystal structures, apart from the mode of  $Mg^{2+}$  binding, there are several other factors that determine the planarity of a basepairing interaction. However,

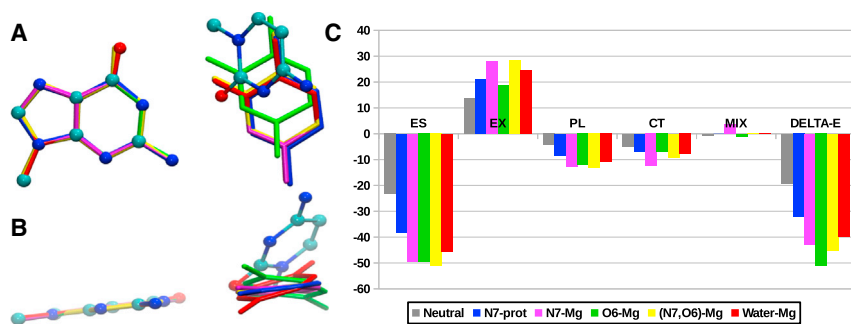

FIGURE 6 (A) B3LYP optimized geometries of G:C W:W Trans pairs with normal (ball-and-stick format), N7 protonated (blue), and  $Mg^{2+}$ -bound guanine are superposed with respect to the guanine residue. (B) Lateral view of the structural superposition in (A). Note the planar geometry for  $Mg^{2+}$  coordination at only N7 (magenta) and at both N7 and O6 (yellow), and the nonplanar geometry for  $Mg^{2+}$  coordination at only O6 (green) and water-mediated  $Mg^{2+}$  coordination (red). (C) Different components of the total interaction energy ( $\Delta E$ ) are shown. ES, electrostatic; EX, exchange repulsion; PL, polarization; CT, charge transfer; MIX, higher-order coupling. To see this figure in color, go online.

in this particular case, the consistency between the crystal geometry and the optimized geometry is remarkable. It shows that Mg<sup>2+</sup> can fine tune the geometry of basepairing interactions. The small difference between the interaction energy of G:C W:W Trans with 1) direct Mg<sup>2+</sup> binding at N7 and 2) Mg<sup>2+</sup> binding via first-shell waters ( $\Delta E_{\text{sol}}^{\text{int}} = 0.5$  kcal/mol) further suggests that such Mg<sup>2+</sup>-binding-based geometric modulation can take place without changing the stability of the overall system. On the other hand, the resulting basepair due to direct Mg<sup>2+</sup> coordination at O6 is  $\sim 3$  kcal/mol stronger than the above two cases and therefore is not likely to be influenced by such low energy conformational changes. Again, the relatively smaller values of the B-factor of the Mg atoms corresponding to direct Mg<sup>2+</sup>-O6 interactions (38.5) compared with that of Mg atoms associated with all other competing interactions is also suggestive of a less flexible G:C W:W Trans interaction on direct binding of Mg<sup>2+</sup> at O6.

## CONCLUSION

G:C W:W Trans basepairs occur frequently in 23S rRNA of all of the four species available in our data set. Occurrence of G:C W:W Trans is also observed in 5.8S rRNA of *Saccharomyces cerevisiae* and in tRNAs (the popular Levitt basepair) of various species. All of these occurrences can be classified into 14 contexts. Among them, Mg<sup>2+</sup> binding at the Hoogsteen edge of guanine is observed in eight contexts, which are integrally associated with a variety of structural motifs including different types of loops and their interactions. Sensitivity of the geometry of these basepairs to the binding mode of Mg<sup>2+</sup>, as described in this work, may imply significant consequences of binding-mode variation for the functional role of those structural motifs. Such sensitivity toward Mg<sup>2+</sup>-binding modes need not be restricted to G:C W:W Trans pairs alone. In fact, binding of magnesium or other divalent ions to other noncanonical basepairs may also result in similar structural variations. Our results thus open up an additional avenue for researching the structural complexity and functional diversity of RNA molecules.

## SUPPORTING MATERIAL

Six figures and two tables are available at [http://www.biophysj.org/biophysj/supplemental/S0006-3495\(17\)30445-9](http://www.biophysj.org/biophysj/supplemental/S0006-3495(17)30445-9).

## AUTHOR CONTRIBUTIONS

A.M. and D.B. have designed the research, with A.H. carrying out background investigations leading to the problem definition. R.R. has implemented the bioinformatics search and analysis protocols. A.H. has carried out Q.M. calculations, and has performed subsequent analysis in conjunction with the bioinformatics results. All authors contributed to writing the article.

## ACKNOWLEDGMENTS

A.H. acknowledges the Council of Scientific and Industrial Research, India, for SRF support. A.M. and A.H. thank the Department of Biotechnology, Government of India (project BT/PR-14715/PBD/16/903/2010) for partial funding and financial support. A.M. and D.B. thank the Department of Biotechnology, Government of India (project BT/PR-11429/BID/07/271/2008) for supporting computational infrastructure.

## REFERENCES

- Cech, T. R., A. J. Zaugg, and P. J. Grabowski. 1981. In vitro splicing of the ribosomal RNA precursor of *Tetrahymena*: involvement of a guanosine nucleotide in the excision of the intervening sequence. *Cell*. 27:487–496.
- Guerrier-Takada, C., K. Gardiner, ..., S. Altman. 1983. The RNA moiety of ribonuclease P is the catalytic subunit of the enzyme. *Cell*. 35:849–857.
- Doudna, J. A., and T. R. Cech. 2002. The chemical repertoire of natural ribozymes. *Nature*. 418:222–228.
- Lee, J. C., and R. R. Gutell. 2004. Diversity of base-pair conformations and their occurrence in rRNA structure and RNA structural motifs. *J. Mol. Biol.* 344:1225–1249.
- Leontis, N. B., and E. Westhof. 2001. Geometric nomenclature and classification of RNA basepairs. *RNA*. 7:499–512.
- Halder, S., and D. Bhattacharyya. 2013. RNA structure and dynamics: a base pairing perspective. *Prog. Biophys. Mol. Biol.* 113:264–283.
- Šponer, J., J. E. Šponer, ..., N. B. Leontis. 2010. Quantum chemical studies of nucleic acids: can we construct a bridge to the RNA structural biology and bioinformatics communities? *J. Phys. Chem. B*. 114:15723–15741.
- Šponer, J., J. E. Šponer, ..., M. Otyepka. 2013. How to understand quantum chemical computations on DNA and RNA systems? A practical guide for non-specialists. *Methods*. 64:3–11.
- Swart, M., C. Fonseca Guerra, and F. M. Bickelhaupt. 2004. Hydrogen bonds of RNA are stronger than those of DNA, but NMR monitors only presence of methyl substituent in uracil/thymine. *J. Am. Chem. Soc.* 126:16718–16719.
- Šponer, J. E., J. Leszczynski, ..., J. Šponer. 2005. Sugar edge/sugar edge base pairs in RNA: stabilities and structures from quantum chemical calculations. *J. Phys. Chem. B*. 109:18680–18689.
- Šponer, J. E., N. Špacková, ..., J. Šponer. 2005. Non-Watson-Crick base pairing in RNA. quantum chemical analysis of the *cis* Watson-Crick/sugar edge base pair family. *J. Phys. Chem. A*. 109:2292–2301.
- Šponer, J. E., N. Špačková, ..., J. Šponer. 2005. Principles of RNA base pairing: structures and energies of the trans Watson-Crick/sugar edge base pairs. *J. Phys. Chem. B*. 109:11399–11410.
- Bhattacharyya, D., S. C. Koripella, ..., B. Sinha. 2007. Theoretical analysis of noncanonical base pairing interactions in RNA molecules. *J. Biosci.* 32:809–825.
- Sharma, P., A. Mitra, ..., D. Bhattacharyya. 2008. Quantum chemical studies of structures and binding in noncanonical RNA base pairs: the trans Watson-Crick:Watson-Crick family. *J. Biomol. Struct. Dyn.* 25:709–732.
- mládek, A., P. Sharma, ..., J. E. Šponer. 2009. Trans Hoogsteen/sugar edge base pairing in RNA. Structures, energies, and stabilities from quantum chemical calculations. *J. Phys. Chem. B*. 113:1743–1755.
- Sharma, P., M. Chawla, ..., A. Mitra. 2010. On the role of Hoogsteen-Hoogsteen interactions in RNA: ab initio investigations of structures and energies. *RNA*. 16:942–957.
- Sharma, P., J. E. Šponer, ..., A. Mitra. 2010. On the role of the *cis* Hoogsteen:sugar-edge family of base pairs in platforms and triplets-quantum chemical insights into RNA structural biology. *J. Phys. Chem. B*. 114:3307–3320.

18. Panigrahi, S., R. Pal, and D. Bhattacharyya. 2011. Structure and energy of non-canonical basepairs: comparison of various computational chemistry methods with crystallographic ensembles. *J. Biomol. Struct. Dyn.* 29:541–556.
19. Mládek, A., J. E. Šponer, ..., J. Šponer. 2012. Understanding the sequence preference of recurrent RNA building blocks using quantum chemistry: the intrastrand RNA dinucleotide platform. *J. Chem. Theory Comput.* 8:335–347.
20. Levitt, M. 1969. Detailed molecular model for transfer ribonucleic acid. *Nature.* 224:759–763.
21. Oliva, R., L. Cavallo, and A. Tramontano. 2006. Accurate energies of hydrogen bonded nucleic acid base pairs and triplets in tRNA tertiary interactions. *Nucleic Acids Res.* 34:865–879.
22. Lemieux, S., and F. Major. 2002. RNA canonical and non-canonical base pairing types: a recognition method and complete repertoire. *Nucleic Acids Res.* 30:4250–4263.
23. Oliva, R., A. Tramontano, and L. Cavallo. 2007. Mg<sup>2+</sup> binding and archaeosine modification stabilize the G15 C48 Levitt base pair in tRNAs. *RNA.* 13:1427–1436.
24. Oliva, R., and L. Cavallo. 2009. Frequency and effect of the binding of Mg<sup>2+</sup>, Mn<sup>2+</sup>, and Co<sup>2+</sup> ions on the guanine base in Watson-Crick and reverse Watson-Crick base pairs. *J. Phys. Chem. B.* 113:15670–15678.
25. Chawla, M., S. Abdel-Azeim, ..., L. Cavallo. 2014. Higher order structural effects stabilizing the reverse Watson-Crick Guanine-Cytosine base pair in functional RNAs. *Nucleic Acids Res.* 42:714–726.
26. Liberman, J. A., M. Salim, ..., J. E. Wedekind. 2013. Structure of a class II preQ1 riboswitch reveals ligand recognition by a new fold. *Nat. Chem. Biol.* 9:353–355.
27. Halder, A., S. Bhattacharya, ..., A. Mitra. 2015. The role of N7 protonation of guanine in determining the structure, stability and function of RNA base pairs. *Phys. Chem. Chem. Phys.* 17:26249–26263.
28. Bevilacqua, P. C., T. S. Brown, ..., R. Yajima. 2004. Catalytic roles for proton transfer and protonation in ribozymes. *Biopolymers.* 73:90–109.
29. Verdolino, V., R. Cammi, ..., H. B. Schlegel. 2008. Calculation of pKa values of nucleobases and the guanine oxidation products guanidinohydantoin and spiroiminodihydantoin using density functional theory and a polarizable continuum model. *J. Phys. Chem. B.* 112:16860–16873.
30. Mirkin, S. M., and M. D. Frank-Kamenetskii. 1994. H-DNA and related structures. *Annu. Rev. Biophys. Biomol. Struct.* 23:541–576.
31. Zain, R., and J. S. Sun. 2003. Do natural DNA triple-helical structures occur and function in vivo? *Cell. Mol. Life Sci.* 60:862–870.
32. Gehring, K., J. L. Leroy, and M. Guéron. 1993. A tetrameric DNA structure with protonated cytosine-cytosine base pairs. *Nature.* 363:561–565.
33. Berger, I., C. Kang, ..., A. Rich. 1995. Extension of the four-stranded intercalated cytosine motif by adenine-adenine base pairing in the crystal structure of d(CCCAAT). *Nat. Struct. Biol.* 2:416–425.
34. Kuttan, A., and B. L. Bass. 2012. Mechanistic insights into editing-site specificity of ADARs. *Proc. Natl. Acad. Sci. USA.* 109:E3295–E3304.
35. Nakano, S., D. M. Chadalavada, and P. C. Bevilacqua. 2000. General acid-base catalysis in the mechanism of a hepatitis delta virus ribozyme. *Science.* 287:1493–1497.
36. Halder, A., S. Halder, ..., A. Mitra. 2014. Feasibility of occurrence of different types of protonated base pairs in RNA: a quantum chemical study. *Phys. Chem. Chem. Phys.* 16:18383–18396.
37. Lindahl, T., A. Adams, and J. R. Fresco. 1966. Renaturation of transfer ribonucleic acids through site binding of magnesium. *Proc. Natl. Acad. Sci. USA.* 55:941–948.
38. Lynch, D. C., and P. R. Schimmel. 1974. Cooperative binding of magnesium to transfer ribonucleic acid studied by a fluorescent probe. *Biochemistry.* 13:1841–1852.
39. Stein, A., and D. M. Crothers. 1976. Conformational changes of transfer RNA. The role of magnesium(II). *Biochemistry.* 15:160–168.
40. Brion, P., and E. Westhof. 1997. Hierarchy and dynamics of RNA folding. *Annu. Rev. Biophys. Biomol. Struct.* 26:113–137.
41. Draper, D. E. 2008. RNA folding: thermodynamic and molecular descriptions of the roles of ions. *Biophys. J.* 95:5489–5495.
42. Butcher, S. E. 2011. The spliceosome and its metal ions. In *Structural and Catalytic Roles of Metal Ions in RNA*, A. Sigel, H. Sigel, and R. K. O. Sigel, eds., RSC Publishing, pp. 235–251.
43. Johnson-Buck, A. E., S. E. McDowell, and N. G. Walter. 2011. Metal ions: supporting actors in the playbook of small ribozymes. *Met. Ions Life Sci.* 9:175–196.
44. Zheng, H., I. G. Shabalin, ..., W. Minor. 2015. Magnesium-binding architectures in RNA crystal structures: validation, binding preferences, classification and motif detection. *Nucleic Acids Res.* 43:3789–3801.
45. Bergonzo, C., K. B. Hall, and T. E. Cheatham, 3rd. 2016. Divalent ion dependent conformational changes in an RNA stem-loop observed by molecular dynamics. *J. Chem. Theory Comput.* 12:3382–3389.
46. Lemkul, J. A., S. K. Lakkaraju, and A. D. MacKerell, Jr. 2016. Characterization of Mg<sup>2+</sup> distributions around RNA in solution. *ACS Omega.* 1:680–688.
47. Shanker, S., and P. Bandyopadhyay. 2016. How Mg<sup>2+</sup> ion and water network affect the stability and structure of non-Watson-Crick base pairs in *E. coli* loop E of 5S rRNA: a molecular dynamics and reference interaction site model (RISM) study. *J. Biomol. Struct. Dyn.* Published online August 2, 2016. <http://dx.doi.org/10.1080/07391102.2016.1213186>.
48. Casalino, L., G. Palermo, ..., A. Magistrato. 2017. Development of site-specific Mg<sup>2+</sup>-RNA force field parameters: a dream or reality? Guidelines from combined molecular dynamics and quantum mechanics simulations. *J. Chem. Theor. Comput.* 10:340–352.
49. Leonarski, F., L. D'Ascenzo, and P. Auffinger. 2016. Mg<sup>2+</sup> ions: do they bind to nucleobase nitrogens? *Nucleic Acids Res.* 45:987–1004.
50. Bowman, J. C., T. K. Lenz, ..., L. D. Williams. 2012. Cations in charge: magnesium ions in RNA folding and catalysis. *Curr. Opin. Struct. Biol.* 22:262–272.
51. Baes, C., and R. Mesmer. 1976. *The Hydrolysis of Cations*. John Wiley and Sons, New York.
52. Leontis, N. B., and C. L. Zirbel. 2012. Nonredundant 3D structure datasets for RNA knowledge extraction and benchmarking. In *RNA 3D Structure and Prediction*, N. Leontis and E. Westhof, eds., (Springer), pp. 281–298.
53. Ray, S. S., S. Halder, ..., D. Bhattacharyya. 2012. HD-RNAS: an automated hierarchical database of RNA structures. *Front. Genet.* 3:59.
54. Allen, F. H. 2002. The Cambridge structural database: a quarter of a million crystal structures and rising. *Acta Crystallogr. B.* 58:380–388.
55. Desiraju, G. R., and T. Steiner. 1999. *The Weak Hydrogen Bond in Structural Chemistry and Biology*. Oxford University Press, Inc., New York, NY.
56. Jeffrey, G. A., and W. Saenger. 2012. *Hydrogen Bonding in Biological Structures*. Springer, Berlin.
57. Das, J., S. Mukherjee, ..., D. Bhattacharyya. 2006. Non-canonical base pairs and higher order structures in nucleic acids: crystal structure database analysis. *J. Biomol. Struct. Dyn.* 24:149–161.
58. Olson, W. K., M. Esguerra, ..., X. J. Lu. 2009. New information content in RNA base pairing deduced from quantitative analysis of high-resolution structures. *Methods.* 47:177–186.
59. Otero-Navas, I., and J. M. Seminario. 2012. Molecular electrostatic potentials of DNA base-base pairing and mispairing. *J. Mol. Model.* 18:91–101.
60. Srinivasadesikan, V., P. K. Sahu, and S. L. Lee. 2012. Quantum mechanical calculations for the misincorporation of nucleotides opposite mutagenic 3,N<sup>4</sup>-ethenocytosine. *J. Phys. Chem. B.* 116:11173–11179.
61. Dennington, R., T. Keith, and J. Millam. 2009. GaussView, Version 5.0.8. Semicem, Shawnee Mission KS.
62. Halder, A., A. Datta, ..., A. Mitra. 2014. Why does substitution of thymine by 6-ethynylpyridone increase the thermostability of DNA double helices? *J. Phys. Chem. B.* 118:6586–6596.

63. Becke, A. D. 1988. Density-functional exchange-energy approximation with correct asymptotic behavior. *Phys. Rev. A Gen. Phys.* 38:3098–3100.
64. Lee, C., W. Yang, and R. G. Parr. 1988. Development of the Colle-Salvetti correlation-energy formula into a functional of the electron density. *Phys. Rev. B Condens. Matter.* 37:785–789.
65. Miehlich, B., A. Savin, ..., H. Preuss. 1989. Results obtained with the correlation energy density functionals of Becke and Lee, Yang and Parr. *Chem. Phys. Lett.* 157:200–206.
66. Chawla, M., R. Oliva, ..., L. Cavallo. 2015. An atlas of RNA base pairs involving modified nucleobases with optimal geometries and accurate energies. *Nucleic Acids Res.* 43:6714–6729.
67. Sharma, P., L. A. Lait, and S. D. Wetmore. 2013. Exploring the limits of nucleobase expansion: computational design of naphthohomologated (xx-) purines and comparison to the natural and xDNA purines. *Phys. Chem. Chem. Phys.* 15:15538–15549.
68. Sharma, P., L. A. Lait, and S. D. Wetmore. 2013. yDNA versus yyDNA pyrimidines: computational analysis of the effects of unidirectional ring expansion on the preferred sugar-base orientation, hydrogen-bonding interactions and stacking abilities. *Phys. Chem. Chem. Phys.* 15:2435–2448.
69. Yanai, T., D. P. Tew, and N. C. Handy. 2004. A new hybrid exchange–correlation functional using the Coulomb-attenuating method (CAM-B3LYP). *Chem. Phys. Lett.* 393:51–57.
70. Grimme, S., J. Antony, ..., H. Krieg. 2010. A consistent and accurate ab initio parametrization of density functional dispersion correction (DFT-D) for the 94 elements H–Pu. *J. Chem. Phys.* 132:154104.
71. Grimme, S., S. Ehrlich, and L. Goerigk. 2011. Effect of the damping function in dispersion corrected density functional theory. *J. Comput. Chem.* 32:1456–1465.
72. Adamo, C., and V. Barone. 1999. Toward reliable density functional methods without adjustable parameters: The PBE0 model. *J. Chem. Phys.* 110:6158–6170.
73. Ireta, J., J. Neugebauer, and M. Scheffler. 2004. On the accuracy of DFT for describing hydrogen bonds: dependence on the bond directionality. *J. Phys. Chem. A.* 108:5692–5698.
74. Rai, S., H. Singh, and U. D. Priyakumar. 2015. Binding to gold nano-clusters alters the hydrogen bonding interactions and electronic properties of canonical and size-expanded DNA base pairs. *RSC Advances.* 5:49408–49419.
75. Zhao, Y., N. E. Schultz, and D. G. Truhlar. 2006. Design of density functionals by combining the method of constraint satisfaction with parametrization for thermochemistry, thermochemical kinetics, and noncovalent interactions. *J. Chem. Theory Comput.* 2:364–382.
76. Zhao, Y., and D. G. Truhlar. 2008. The M06 suite of density functionals for main group thermochemistry, thermochemical kinetics, noncovalent interactions, excited states, and transition elements: two new functionals and systematic testing of four M06-class functionals and 12 other functionals. *Theor. Chem. Acc.* 120:215–241.
77. Zhao, Y., and D. G. Truhlar. 2007. Density functionals for noncovalent interaction energies of biological importance. *J. Chem. Theory Comput.* 3:289–300.
78. Santoro, F., V. Barone, and R. Improta. 2008. Can TD-DFT calculations accurately describe the excited states behavior of stacked nucleobases? The cytosine dimer as a test case. *J. Comput. Chem.* 29:957–964.
79. Jose, D., and A. Datta. 2011. Role of multicentered bonding in controlling magnetic interactions in  $\pi$ -Stacked Bis-dithiazolyl radical. *Cryst. Growth Des.* 11:3137–3140.
80. Dargiewicz, M., M. Biczysko, ..., V. Barone. 2012. Solvent effects on electron-driven proton-transfer processes: adenine-thymine base pairs. *Phys. Chem. Chem. Phys.* 14:8981–8989.
81. Wang, J., J. Gu, and J. Leszczynski. 2012. The electronic spectra and the H-bonding pattern of the sulfur and selenium substituted guanines. *J. Comput. Chem.* 33:1587–1593.
82. Mou, Z., K. Uchida, ..., M. Kertesz. 2014. Evidence of  $\sigma$ - and  $\pi$ -dimerization in a series of phenalenyls. *J. Am. Chem. Soc.* 136:18009–18022.
83. Ando, H., B. P. Fingerhut, ..., S. Mukamel. 2014. Femtosecond stimulated Raman spectroscopy of the cyclobutane thymine dimer repair mechanism: a computational study. *J. Am. Chem. Soc.* 136:14801–14810.
84. Boys, S. F., and F. Bernardi. 1970. The calculation of small molecular interactions by the differences of separate total energies. Some procedures with reduced errors. *Mol. Phys.* 19:553–566.
85. Ditchfield, R., W. J. Hehre, and J. A. Pople. 1971. Self-consistent molecular-orbital methods. IX. An extended Gaussian-type basis for molecular-orbital studies of organic molecules. *J. Chem. Phys.* 54:724–728.
86. Cossi, M., N. Rega, ..., V. Barone. 2003. Energies, structures, and electronic properties of molecules in solution with the C-PCM solvation model. *J. Comput. Chem.* 24:669–681.
87. Barone, V., and M. Cossi. 1998. Quantum calculation of molecular energies and energy gradients in solution by a conductor solvent model. *J. Phys. Chem. A.* 102:1995–2001.
88. Klamt, A., and G. Schuurmann. 1993. COSMO: a new approach to dielectric screening in solvents with explicit expressions for the screening energy and its gradient. *J. Chem. Soc., Perkin Trans. 2.* 799–805.
89. Dunning, T. H. 1989. Gaussian basis sets for use in correlated molecular calculations. I. The atoms boron through neon and hydrogen. *J. Chem. Phys.* 90:1007–1023.
90. Kitaura, K., and K. Morokuma. 1976. A new energy decomposition scheme for molecular interactions within the Hartree-Fock approximation. *Int. J. Quantum Chem.* 10:325–340.
91. Schmidt, M. W., K. K. Baldrige, ..., J. A. Montgomery, Jr. 1993. General atomic and molecular electronic structure system. *J. Comput. Chem.* 14:1347–1363.
92. Foster, J. P., and F. Weinhold. 1980. Natural hybrid orbitals. *J. Am. Chem. Soc.* 102:7211–7218.
93. Reed, A. E., L. A. Curtiss, and F. Weinhold. 1988. Intermolecular interactions from a natural bond orbital, donor-acceptor viewpoint. *Chem. Rev.* 88:899–926.
94. Glendening, E. D., A. E. Reed, ..., F. Weinhold. 2001. NBO Version 3.1. ScienceOpen Research, Boston, MA.
95. Frisch, M. J., ..., D. J. Fox. 2009. Gaussian 09 Revision C.01.. Gaussian, Wallingford, CT.
96. Mukherjee, S., M. Bansal, and D. Bhattacharyya. 2006. Conformational specificity of non-canonical base pairs and higher order structures in nucleic acids: crystal structure database analysis. *J. Comput. Aided Mol. Des.* 20:629–645.
97. Olson, W. K., M. Bansal, ..., H. M. Berman. 2001. A standard reference frame for the description of nucleic acid base-pair geometry. *J. Mol. Biol.* 313:229–237.
98. Humphrey, W., A. Dalke, and K. Schulten. 1996. VMD: visual molecular dynamics. *J. Mol. Graph.* 14:33–38, 27–28.

**Biophysical Journal, Volume 113**

**Supplemental Information**

**How Does  $Mg^{2+}$  Modulate the RNA Folding Mechanism: A Case Study of  
the G:C W:W Trans Basepair**

**Antarip Halder, Rohit Roy, Dhananjay Bhattacharyya, and Abhijit Mitra**

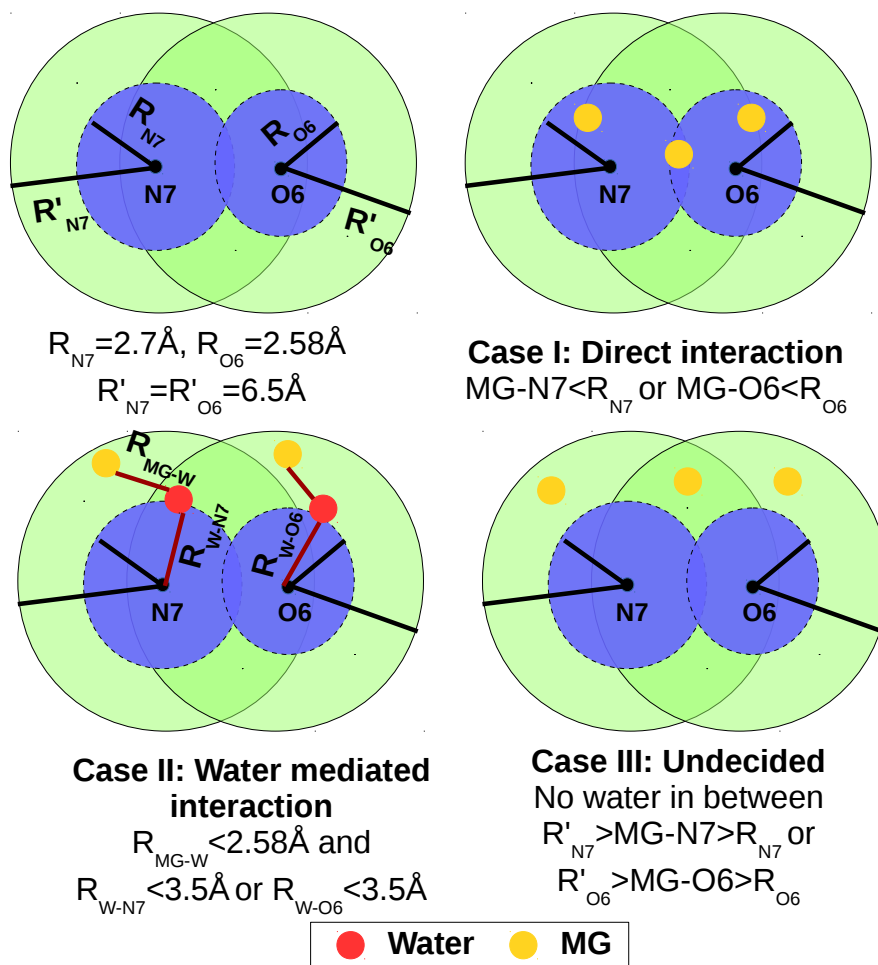

Figure S1: Pictorial description of the algorithm used to identify  $Mg^{2+}$  bound G:C W:W Trans pair.

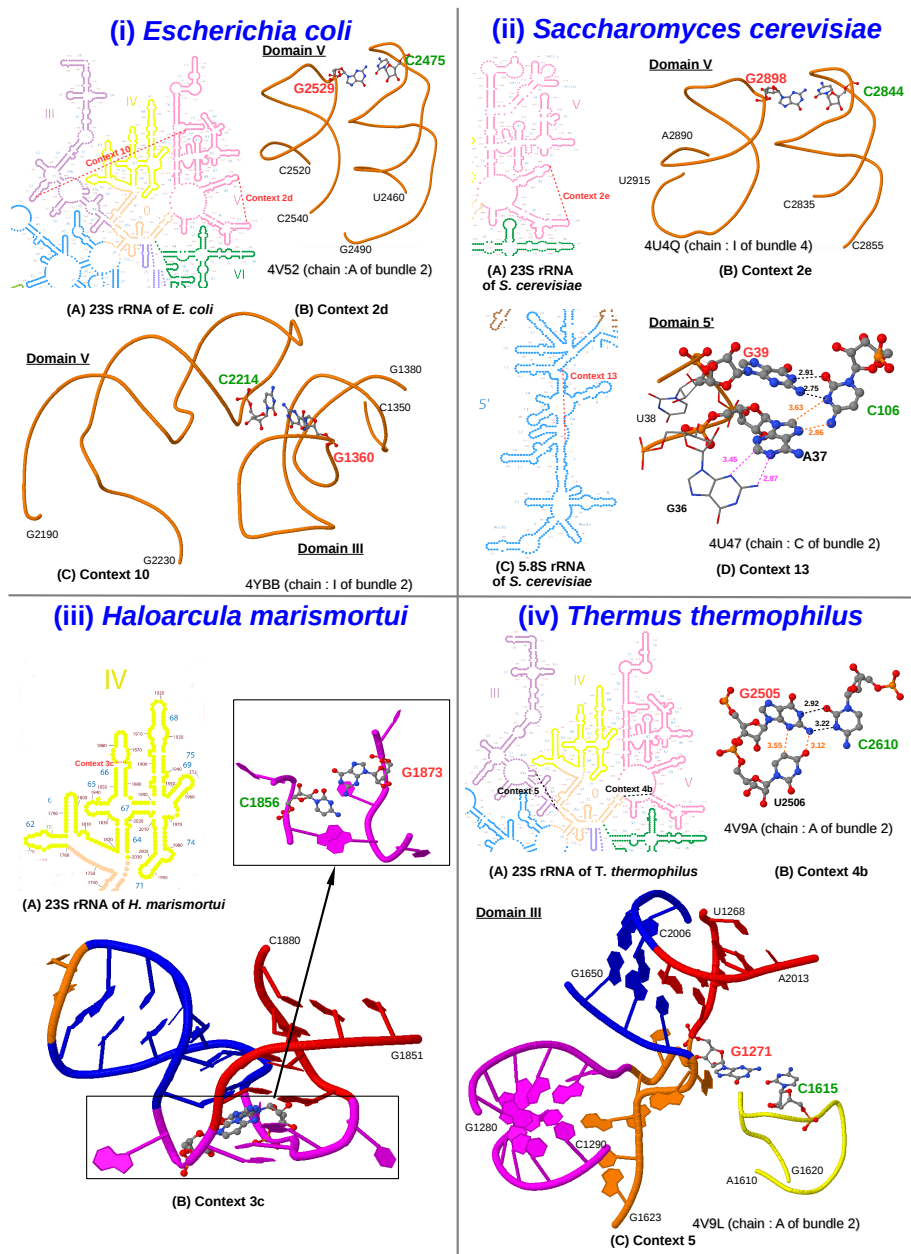

Figure S2: Occurrence context of G:C W:W Trans base pairs, where  $Mg^{2+}$  binding at the hoogsteen edge of guanine has been identified in the crystal structures. 2D plots of the 23S rRNA of *E. coli*, *S. cerevisiae*, *H. marismortui* and *T. thermophilus* and 5.8S rRNA of *S. cerevisiae* are taken from RibosomeGallery available with RiboVision. <sup>?</sup>

Table S1: NBO charges (in Hartree a.u.) at the hydrogen atoms of guanine's Watson-Crick edge. Hw and Hs represent the hydrogen atoms of amino group that belong to the Watson-crick edge and sugar edge, respectively.

| Guanine  | N1-H  | N2-Hw | N2-Hs |
|----------|-------|-------|-------|
| Normal   | 0.443 | 0.415 | 0.433 |
| N7+      | 0.463 | 0.443 | 0.460 |
| N7-Mg    | 0.467 | 0.446 | 0.465 |
| O6-Mg    | 0.453 | 0.441 | 0.465 |
| Both-Mg  | 0.465 | 0.445 | 0.467 |
| Water-Mg | 0.460 | 0.442 | 0.463 |



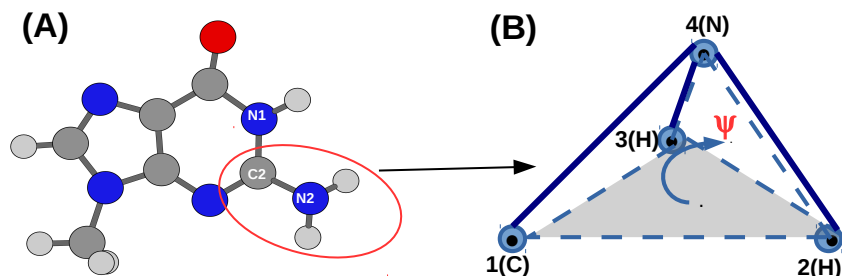

Figure S3: Definition of the improper dihedral angle  $\psi$  that defines the extent of pyramidalization of the exocyclic amino group of guanine. A high value of  $\psi$  indicates a high pyramidalization.

Table S2: Details of the interaction energy of the B3LYP optimized geometries calculated at MP2 level.  $E_{MP2}^{int}$  is the difference between the electronic energies of the pair and the constituent monomers at MP2 level. It has two components  $E_{HF}^{int}$  and  $E_{corr}^{int}$ , which represents the HF and the correlation component respectively.  $E_{CPCM}^{int}$  is the difference between the electronic energies of the pair and the constituent monomers at MP2 level with solvent screening implemented implicitly using CPCM model. BSSE represents the Basis Set Superposition Error calculated using counterpoise method. Finally  $E^{int}$  and  $E_{sol}^{int}$  represents the BSSE corrected interaction energies energies, *i.e.*,  $E^{int} = E_{MP2}^{int} + BSSE$ , and,  $E_{sol}^{int} = E_{CPCM}^{int} + BSSE$

| System                | $E_{MP2}^{int}$ | $E_{HF}^{int}$ | $E_{corr}^{int}$ | %HF  | $E_{CPCM}^{int}$ | BSSE | $E^{int}$ | $E_{sol}^{int}$ |
|-----------------------|-----------------|----------------|------------------|------|------------------|------|-----------|-----------------|
| Neutral               | -20.0           | -14.5          | -5.5             | 72.7 | -12.7            | 3.2  | -16.7     | -9.5            |
| N7 -Prot              | -34.1           | -26.5          | -7.6             | 77.8 | -16.7            | 3.6  | -30.5     | -13.1           |
| Mg-N7-direct          | -43.6           | -33.2          | -10.4            | 76.2 | -17.3            | 4.0  | -39.6     | -13.3           |
| Mg-O6-direct          | -47.7           | -39.0          | -8.7             | 81.8 | -20.8            | 4.7  | -43.0     | -16.1           |
| Mg-Both(N7,O6)-direct | -45.5           | -36.6          | -8.9             | 80.5 | -18.1            | 4.1  | -41.5     | -14.0           |
| Water mediated        | -40.6           | -30.2          | -10.4            | 74.5 | -16.7            | 3.9  | -36.7     | -12.8           |

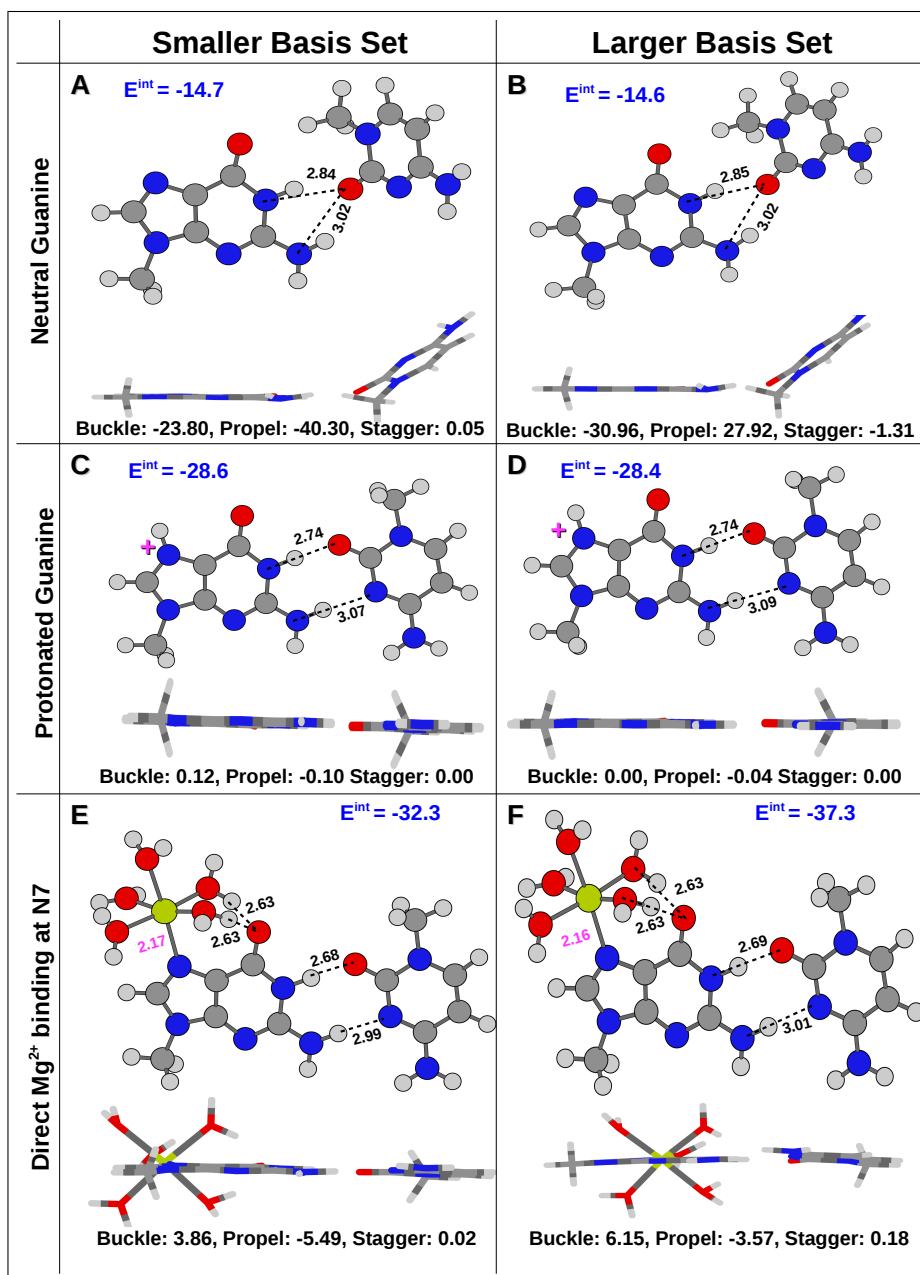

Figure S4: Comparison between the B3LYP optimized geometries and corresponding interaction energies obtained for a smaller basis set (6-311++G(d,p) for Mg and 6-31++G(2d,2p) for other atoms, respectively) and for a larger basis set (6-311++G(2df,2pd)). Optimized geometries of the G:C W:W Trans base pair with neutral guanine (A & B), N7 protonated guanine (C & D) and guanine where  $Mg^{2+}$  is directly bound at N7 (E & F) are shown. For each case, a lateral view of the optimized structure is also shown to highlight the extent of nonplanarity of the interaction. The same has been quantified by Buckle, Propeller Twist and Stagger parameters. Hydrogen bonds are represented by broken lines along with the distances between the donor and the acceptor atoms in Å. Distance between Mg and N7 is reported in magenta colored text. Interaction energies ( $E_{DFT}^{int}$ ) are reported in kcal/mol.

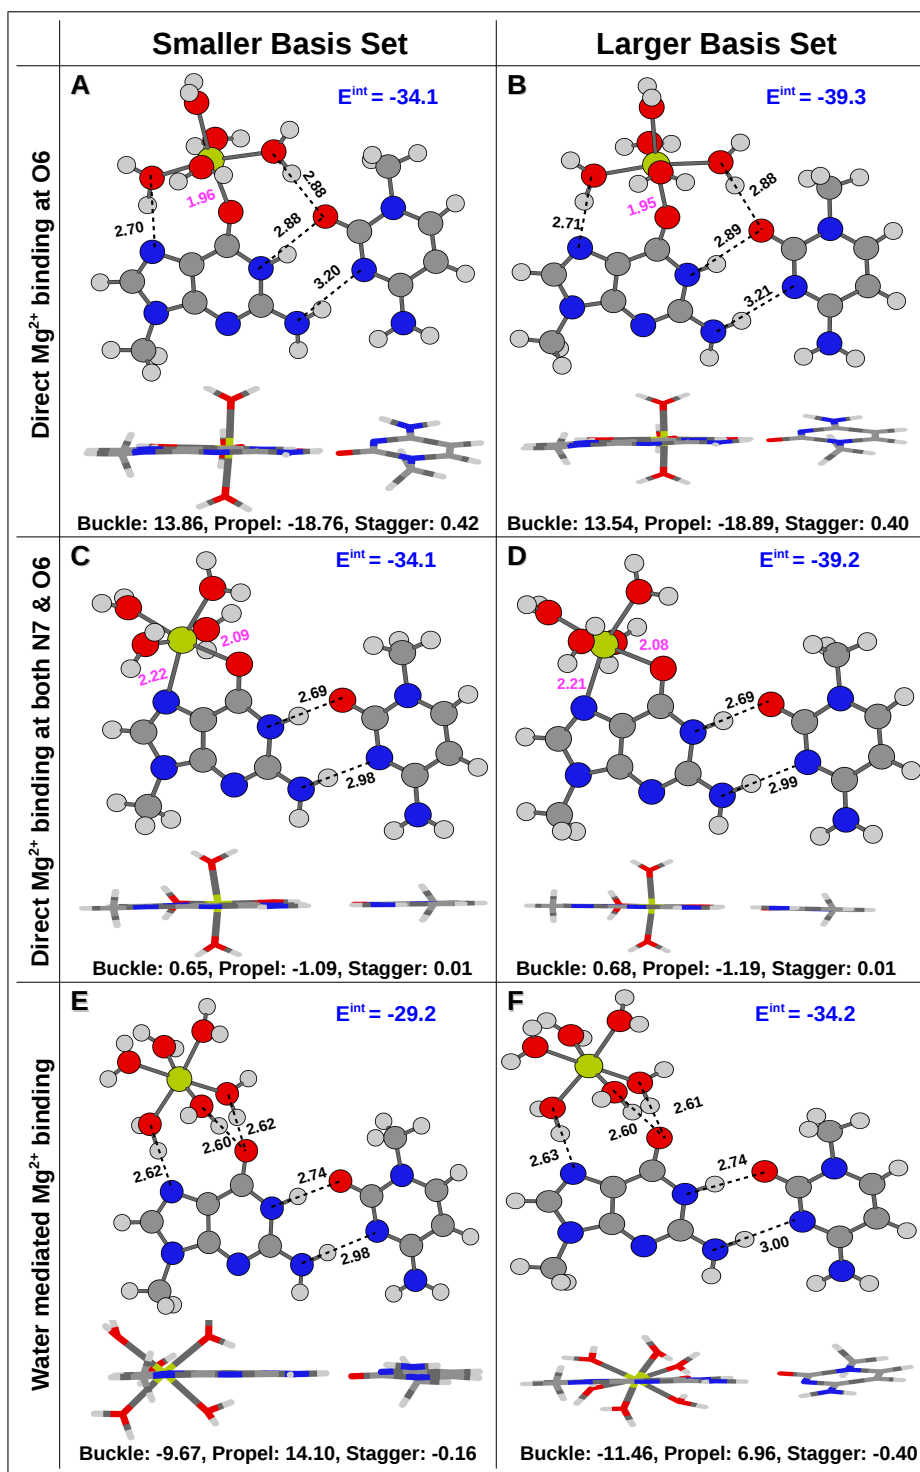

Figure S5: Comparison between the B3LYP optimized geometries and corresponding interaction energies obtained for a smaller basis set (6-311++G(d,p) for Mg and 6-31++G(2d,2p) for other atoms, respectively) and for a larger basis set (6-311++G(2df,2pd)). Optimized geometries of the G:C W:W Trans base pair with Mg<sup>2+</sup> guanine, where Mg<sup>2+</sup> is directly bound at O6 (A & B); where Mg<sup>2+</sup> is directly bound at both N7 & O6 (C & D) and where Mg<sup>2+</sup> interacts through its first shell water molecules (E & F) are shown. Other annotations are same as Figure S4

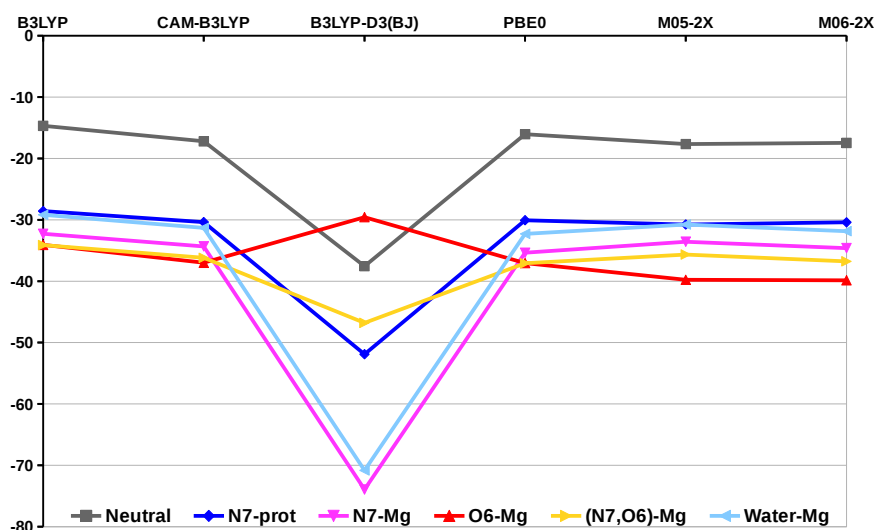

Figure S6: Interaction energy of neutral, protonated, and  $Mg^{2+}$  bound (in four different modes) G:C W:W Trans base pairs calculated at different DFT functionals. Color scheme and annotations are consistent with Figure 6C.

## S1 PDB Ids of the RNA crystal structures studied in this work

### S1.1 HD-RNAS (167 files)

URL: <http://www.saha.ac.in/biop/www/HD-RNAS.html>

2du6 ,2zue ,1f7u ,3kfu ,1b23 ,2fmt ,1yfg ,4arc ,3vjr ,2bte ,2azz ,3eph ,1o0c ,3knl ,3akz ,1euy ,1zjw ,3amt ,1ffy ,1qu2 ,2zni ,3foz ,1evv ,2zm5 ,3tup ,1ehz ,3a3a ,3hl2 ,3add ,2fk6 ,1qf6 ,2dr2 ,2y10 ,2xqd ,3am1 ,1c0a ,1il2 ,2der ,1gtr ,1n78 ,1qtq ,1wz2 ,3tvf ,3uye ,4as1 ,2ct8 ,3knh ,4dh9 ,2csx ,2du5 ,1h4s ,3rg5 ,1ser ,4gaq ,3uz6 ,1j1u ,3uz8 ,1j2b ,1gax ,1i6u ,2vqe ,3r8n ,3u5b ,2zjr ,3r8s ,1mms ,1vqo ,3v2d ,3u5d ,1un6 ,2xg0 ,1u8d ,1xok ,2vpl ,1zho ,2nz4 ,1hr2 ,1gid ,1c9s ,1s1j ,3nkb ,3g78 ,2z75 ,2r8s ,2gcv ,1m5o ,3cul ,3d2v ,3f2q ,4enc ,2xnx ,3npq ,3irw ,3v7e ,4fe5 ,1y26 ,3q3z ,3gx5 ,3suh ,3dio ,2pxv ,119a ,1lng ,3ktw ,1hq1 ,2pxb ,2a64 ,1u9s ,1p6v ,3r9w ,3r9x ,2b57 ,3npb ,1gtn ,1gtf ,3snp ,3pu0 ,3pu1 ,2xd0 ,2zzn ,2zzm ,2ozb ,2gje ,3ptx ,3pu4 ,1fir ,3moj ,3hhz ,357d ,3knn ,1s03 ,3siv ,2xdb ,2xdd ,2il9 ,3nmu ,1kxk ,1vfg ,3pyu ,3kiq ,3kir ,3kit ,3pyn ,3u4m ,3ciy ,1jbr ,3nkv ,3hax ,3ovb ,3ovs ,3p22 ,1kh6 ,3pla ,1ddy ,3r4f ,3rw6 ,2zh1 ,3icq ,2ggt ,2nue ,2hvy ,1u6b ,2hw8 ,2jea ,3lww ,1xjr ,3ds7

### S1.2 NDB (838 files)

URL: <http://rna.bgsu.edu/rna3dhub/nrlist/>

1urn ,3iab ,1ooa ,3r4f ,3zp8 ,3snp ,4a3e ,4pqv ,1kxk ,4bxx ,3siu ,3la5 ,4tzz ,1cvj ,2bh2 ,4a3d ,4a3k ,3b5f ,4lx6 ,4q5s ,1p6v ,3egz ,364d ,1t0d ,1yfg ,3nkv ,1hys ,4boc ,3hk2 ,1i9v ,1mji ,2tra ,1y26 ,4n0t ,2du3 ,3moj ,2du6 ,1jbr ,2d2l ,3cw5 ,1h4s ,1qc0 ,4ngf ,3nkb ,1f7v ,1fir ,4c4w ,1vfg ,4jf2 ,3vjr ,4o18 ,2ake ,4a93 ,2dlc ,1vby ,3tup ,1u0b ,total ,3ouy ,2ozb ,3e2e ,1qu2 ,2g3s ,4kr2 ,2p7d ,2hoj ,1j1u ,1i6u ,3wqy ,3po2 ,1qf6 ,1q96 ,1b23 ,2rfk ,1VY9 ,3amu ,2zuf ,4k4w ,4p5j ,3umy ,2hvy ,1eiy ,1qrs ,4mcf ,1VY8 ,4qi2 ,2zzm ,3cz3 ,4lvz ,4db2 ,4kr6 ,2gjj ,3hjj ,3gtl ,4kr7 ,4k4u ,1qbp ,3am1 ,3hax ,3m3y ,1h3e ,3qsy ,4aob ,2i82 ,4b5r ,1feu ,3dh3 ,3al0 ,3bnq ,2nok ,1s03 ,2pn4 ,3gx5 ,4kzd ,4ts2 ,3fu2 ,1d4r ,4l81 ,1tfy ,4wkj ,1tfw ,4o26 ,4q0b ,3sus ,1nuv ,3p59 ,3zla ,1lng ,3htx ,3ciy ,1yyw ,2vpl ,4w92 ,1u63 ,3hou ,4pqu ,1ykv ,3w3s ,3ucz ,4wfl ,1duq ,4qlm ,4H6F ,1egk ,3a6p ,4jrc ,4qyz ,3f4g ,4qk9 ,4kqy ,1qa6 ,4g7o ,1zx7 ,4csf ,4mgm ,1fjg ,4qk8 ,3j7y ,2AW7 ,4un5 ,4un3 ,1un6 ,4v19 ,4ilm ,3rw6 ,1mfq ,3ivn ,3icq ,2o5i ,2o1u ,3slq ,3j7a ,3siv ,1hmh ,4uyk ,4u7u ,3eph ,2quw ,2zzn ,2ho7 ,4W23 ,1h38 ,3U5F ,2der ,2zni ,2zm5 ,3pla ,2azz ,1efw ,1il2 ,2qbz ,2wj8 ,3wfs ,2qux ,1u9s ,1j2b ,2y9h ,2csx ,3d2v ,3q3z ,2qwy ,2d6f ,4k4y ,2cv1 ,1gax ,3d0u ,3o18 ,2bte ,4aq7 ,2gdi ,3ol7 ,4gxy ,4frg ,4rge ,3o19 ,3rg5 ,3dir ,3owz ,1et4 ,1wz2 ,1glx ,3add ,3adc ,4p9r ,3cun ,3iwn ,3ktw ,4k50 ,3p22 ,4frn ,2ggt ,4FY3 ,2xd0 ,4plx ,4uyj ,1m5o ,1u6b ,1VW3 ,4eya ,4oo8 ,2czj ,4ioa ,4m6d ,3v7e ,1s72 ,4QCN ,2il9 ,3ivk ,2QBG ,3rkf ,1nbs ,3r1c ,4qjd ,2a64 ,3U5H ,3kfu ,1kog ,1VX6 ,1gid ,4mgn ,3hga ,3ok4 ,1rmv ,4ejt ,3j06 ,4lck ,4W21 ,1rxa ,4ang ,3ahu ,3pdm ,1vtm ,2x1a ,1mdg ,1laj ,1osu ,2c4z ,2c50 ,1p79 ,2fz2 ,4afy ,4alp ,2xnr ,4lq3 ,4jij ,4n2s ,333d ,3u2e ,2x1f ,1h2c ,4ohy ,4n2q ,3qjp ,2r7u ,2r7v ,4qu6 ,4lmz ,4faw ,2r7s ,3o8c ,3mj0 ,2tmv ,4r3i ,3hsb ,4ms9 ,4ohz ,2r7t ,283d ,3pf4 ,3qsu ,3gpp ,3rtj ,2vop ,1g2j ,3b0u ,3nj6 ,4dwa ,3q0q ,3q0r ,3q0s ,2a1r ,4jzv ,4jvh ,3k5q ,3k5y ,3k5z ,3k61 ,3k62 ,3k64 ,4tu0 ,3pf5 ,3rc8 ,3t3o ,1b2m ,2voo ,4i67 ,2xs7 ,4rkv ,3qgc ,1l3z ,1kq2 ,4hot ,4hos ,3avt ,4nku ,4lj0 ,2asb ,4j7m ,4qu7 ,3nna ,2g91 ,1n1h ,4l3d ,3o8r ,3v71 ,3v6y ,2xs2 ,3bsb ,4j7l ,4oa0 ,1nb7 ,4hor ,1flx ,2bbv ,1si3 ,4nl3 ,3nma ,1i5l ,1pgl ,3mij ,3nmr ,4jab ,255d ,2q66 ,2r7w ,4oav ,3t5n ,3v74 ,3l26 ,1uvk ,4rcj ,1g2e ,4kre ,3nnc ,4d25 ,1uvi ,3ice ,3gib ,2c0b ,2po1 ,4ola ,3pey ,2q1r ,3g9y ,2vnu ,4am3 ,3mdg ,3mdi ,4e59 ,4u35 ,2v7r ,4u34 ,259d ,402d ,4cs1 ,3iev ,1wpu ,3sqw ,1uvj ,2jea ,3czw ,4fts ,4kxt ,1cwp ,4e78 ,2xs5 ,4c8y ,4g9z ,3r1e ,4al7 ,3nd3 ,3q0o ,3i5x ,3i5y ,1wmq ,1av6 ,2a8v ,4qm6 ,4ii9 ,4mdx ,2xgj ,4krf ,4c8z ,2vuq ,2a0p ,3p4c ,3p4d ,4c40 ,4fln ,2xzo ,2b2d ,3jxr ,3oin ,2xli ,1kd5 ,438d ,1kfo ,3ie1 ,1uvm ,3q0p ,2bx2 ,1ddl ,3o7v ,2jlu ,2jlv ,2vrt ,4g0a ,3bx3 ,2g4b ,3aev ,3er9 ,2von ,1n38 ,4gv9 ,3kmq ,2f8k ,3knc ,4o8j ,3rer ,1uvl ,1pvo ,4ba2 ,4jvy ,4fsj ,2vod ,1zse ,1zdj ,4e58 ,2gxb ,3gvn ,421d ,479d ,4msr ,3bnt ,1bmV

,4ht9 ,4n48 ,3bx2 ,4dzs ,4b3g ,4ftb ,3kms ,3n10 ,422d ,472d ,1dqh ,4jrd ,377d ,3ibk ,1m8y ,4ngd ,3qrr ,3bsx ,4nha ,4f3t ,3uld ,3vnu ,1wne ,165d ,2y8y ,439d ,4l8h ,3eqt ,2r22 ,2j1z ,1xpo ,1xpr ,1xpu ,1knz ,3fht ,2izn ,2y8w ,3avu ,2v6w ,4fvu ,3l25 ,4j39 ,3pkm ,4jk0 ,4w5n ,3qjj ,3qjl ,1zh5 ,3qrp ,1i9x ,1j6s ,4j5v ,2jlx ,3d2s ,2atw ,1n35 ,1uvn ,1ytu ,3vvn ,4nlf ,3fs0 ,1lnt ,157d ,3c3z ,4jrt ,4knq ,2ix1 ,354d ,3avv ,4e6b ,2pjp ,2r20 ,433d ,4pei ,4f02 ,3bso ,1fuf ,3boy ,2py9 ,3m85 ,3q2t ,3bsn ,3cgp ,3cgr ,3cgs ,3ssf ,1rna ,4kyy ,2gje ,3dd2 ,3m7n ,3nnh ,2ann ,2e9r ,4c9d ,4w5r ,3adi ,1l2x ,4h5p ,1b7f ,2e9z ,387d ,4tv0 ,3hxm ,3r2d ,4ay2 ,353d ,1csl ,2a43 ,466d ,435d ,405d ,3q50 ,2nz4 ,4pmw ,1f8v ,2izm ,1k8w ,3avv ,1mhk ,397d ,4gha ,2val ,1m8w ,4peh ,3r2c ,4bw0 ,1zbi ,1zbl ,4oq8 ,3avx ,2bgg ,3ncu ,3lrr ,3k49 ,3avy ,2j0s ,7msf ,3ho1 ,3tmi ,2xsl ,4pcj ,2w89 ,420d ,3og8 ,1jid ,1jzv ,4w5t ,2iz9 ,4ato ,4kji ,3hm9 ,3sn2 ,4h8k ,406d ,398d ,1flt ,1j9h ,3p6y ,4bwm ,2zy6 ,1zev ,2jlt ,4m59 ,4w5q ,2bu1 ,3glp ,2oe5 ,4m7d ,4w5o ,1u1y ,2e9t ,3hjf ,1f27 ,3lrr ,3trz ,3sj2 ,1o9m ,2ao5 ,3r9w ,2db3 ,4ool ,4m7a ,4ill ,1t0k ,4qil ,2ec0 ,1e7k ,1sa9 ,2hw8 ,1saq ,4pbd ,4e5c ,4ijs ,1UTF ,3mqk ,3szx ,1t0e ,4fxd ,4ghl ,2bq5 ,5msf ,4jah ,2dr8 ,361d ,3syw ,1mw1 ,3bnl ,4qqb ,6msf ,3ova ,2fqn ,2az2 ,3td0 ,4k31 ,2grb ,4jng ,3bt7 ,1zbh ,1xok ,2o3x ,3td1 ,4ktg ,3mei ,2qek ,4bhh ,4u8t ,1br3 ,1ec6 ,1ntb ,4hkq ,4oog ,2o3v ,4kq0 ,409d ,1duh ,1sds ,3rzo ,1yzd ,1q2r ,4gg4 ,4nfo ,4qik ,2zi0 ,1nlc ,2awe ,2gic ,3ptx ,3pu0 ,4iqs ,3s1m ,3s1n ,2f8s ,3bnp ,2zko ,1xpe ,280d ,4jlg ,1gtn ,1gtf ,4o41 ,4mce ,1rpu ,2qk9 ,4erd ,3erc ,4lgt ,3npu ,3loa ,1yz9 ,3ks8 ,1xjr ,2nue ,3p4b ,3pu1 ,3zc0 ,1qcu ,3agv ,4wsb ,3r9x ,4wsa ,4wrt ,3b31 ,4py5 ,3ftm ,1kh6 ,1utd ,3s1r ,3ts0 ,1dfu ,429d ,4ig8 ,1r9f ,2q1o ,4k27 ,3s2d ,1rlg ,4enb ,3wbm ,4oji ,2f8t ,3ts2 ,2i91 ,3s14 ,2ply ,1sdr ,2xb2 ,1VW4 ,3s49 ,3s15 ,3ftf ,2nug ,2pxv ,3s16 ,1i6h ,3r1d ,3s17 ,3e5c ,2b3j ,1qln ,488d ,3nvi ,3nj7 ,3po3 ,4k4v ,1mzp ,4m30 ,3t5q ,4a3g ,4gcw ,1jbs ,4m4o ,1m8v ,2w2h ,1s77 ,1yvp ,2ez6 ,4kz2 ,3fo4 ,1msw ,4e48 ,3f73 ,1r3e ,1f7y ,4c7o ,1e8o ,3bsu ,1ser ,4ifd ,1a9n ,4b3o

## S1.3 Complete dataset (2464 files)

URL: <https://drive.google.com/open?id=0Bz9N3h6Uh7BYd0hHRmIyU1A3S0E>

### X-ray crystal structures with resolution less than 3.5Å (1873 files)

2xpj ,3hga ,3ok4 ,4ejt ,1rxa ,3wzi ,4ang ,3ahu ,2x1a ,1mdg ,1laj ,1osu ,2c4z ,2c50 ,2c51 ,1p79 ,2fz2 ,4afy ,4alp ,2xnr ,4qvc ,4lq3 ,4jyy ,4n2s ,333d ,3u2e ,2x1f ,1h2c ,1eqq ,4oi0 ,4oi1 ,4ohy ,4n2q ,3qjp ,2r7u ,2r7v ,4yoe ,4qu6 ,4lmz ,2r7s ,3o8c ,3mj0 ,4r3i ,4qvd ,3hsb ,4ms9 ,4ohz ,2r7r ,2r7t ,283d ,3pf4 ,4rcm ,3qsu ,3gpq ,3rtj ,2vop ,1g2j ,3b0u ,3nj6 ,4dwa ,3qg9 ,3q0q ,3q0r ,3q0s ,3af6 ,4s2y ,5bud ,2a1r ,4jzv ,4jvh ,3k5q ,3k5y ,3k5z ,3k61 ,3k62 ,3k64 ,4tu0 ,3t3n ,3pf5 ,1h2d ,3rc8 ,3t3o ,4x9e ,1b2m ,2voo ,4i67 ,2xs7 ,4rby ,4rbz ,4rc0 ,4rkv ,3qbg ,3qgc ,4s2x ,1l3z ,4jzu ,1kq2 ,4hot ,4hos ,3avt ,4nku ,4lj0 ,2asb ,4j7m ,4qu7 ,3nna ,2g9l ,4u3p ,4xk0 ,1n1h ,4rj1 ,4l3d ,3o8r ,3v71 ,5bte ,3v6y ,2xs2 ,3bsb ,4j71 ,4oau ,1nb7 ,4hor ,1fxl ,2bbv ,1si3 ,4nl3 ,3nma ,1i5l ,1pgl ,3mij ,3nmr ,4jab ,255d ,2q66 ,2r7w ,4oav ,3t5n ,3v74 ,3l26 ,4tyw ,4tz0 ,4tz6 ,1uvk ,4rcj ,1g2e ,4kre ,3nnc ,1wrq ,4d26 ,4d25 ,1uvi ,3ice ,3gib ,2c0b ,2po1 ,4ola ,4olb ,3pey ,2qlr ,3g9y ,2vnu ,4am3 ,3mdg ,3mdi ,4e59 ,4u35 ,2v7r ,4u34 ,4u37 ,259d ,402d ,4u3l ,4u3o ,4u3r ,4u47 ,4u78 ,4csl ,3iev ,1wpu ,3sqw ,3sqx ,1uvj ,2jea ,3czw ,4fte ,4fts ,3pew ,4tyy ,4kxt ,1cwp ,4wkr ,4e78 ,2xs5 ,4c8y ,4g9z ,3r1e ,4al7 ,1rxb ,3nd3 ,3nd4 ,3q0o ,3i61 ,3i62 ,3i5x ,3i5y ,1wmq ,1av6 ,3o3i ,2a8v ,4qm6 ,4i19 ,4mdx ,2xgj ,4krf ,4wal ,4e8z ,4u6m ,4u6l ,2vuq ,2a0p ,3p4c ,3p4d ,4c40 ,4fln ,3o6e ,4ht8 ,2xzo ,2b2d ,2r7y ,3jxr ,4gv3 ,4gv6 ,3oin ,4al6 ,2xli ,1kd3 ,1kd4 ,1kd5 ,438d ,1kfo ,3iel ,1uvm ,3q0m ,3q0p ,2bx2 ,1ddl ,3o7v ,2jlu ,2jlv ,2vrt ,4g0a ,3bx3 ,2g4b ,3aev ,3er9 ,2von ,1n38 ,4wtk ,4wtl ,4wtm ,4wti ,4wtj ,4gv9 ,3kmq ,2xjl ,2f8k ,3knc ,4o8j ,3d0m ,3rer ,1uvl ,5c0y ,1pvo ,4ngg ,4ba2 ,4jvy ,4fsj ,2vod ,1zse ,4iqx ,1zjd ,4e58 ,2gxb ,3gvn ,421d ,479d ,4msr ,2r7x ,3q0n ,1m8x ,3bnt ,1bmv ,4nh5 ,3g0h ,4ht9 ,4n48 ,3bx2 ,4dzs ,4b3g ,4ftb ,3klv ,3kms ,3kna ,3n10 ,422d ,472d ,3jxq ,1efo ,1dqf ,1dqh ,4jrd ,377d ,3ibk ,3q0l ,1m8y ,4ngb ,4ngc ,4ngd ,3qrr ,3bsx ,4nha ,4f3t ,2bs1 ,3uld ,3vnu ,1wne ,2g8f ,2g8h ,2g8k ,2g8u ,2g8v ,2g8w ,2gun ,165d ,2y8y ,439d ,4l8h ,3eqt ,2g92 ,1g4q ,1fix ,404d ,2ykg ,205d ,2r21 ,2r22 ,4nh3 ,2jly ,2j1z ,1xpo ,1xpr ,1xpu ,1knz ,3fht ,4wta ,4wte ,4wtf ,4wtg ,2izn ,2iz8 ,2c4q ,2c4y ,4wte ,4wtd ,2y8w ,4zld ,3avu ,2v6w ,4fvu ,3l25 ,2dqq ,2dqp ,2dqg ,4bpb ,3zd6 ,4j39 ,1j8g ,3pkm ,4jk0 ,2jlv ,4w5n ,3qjj ,3qjl ,4x2b ,1yty ,1zh5 ,3qrp ,3adl ,1jb8 ,1i9x ,4jgn ,1j6s ,4nh6 ,4j5v ,2jlx ,3d2s ,2atw ,3twh ,1n35 ,2g8i ,1uvn ,1ytu ,4nmg ,3vav ,4nxx ,4nlf ,3fs0 ,1lnt ,3vyx ,157d ,3c3z ,4jrt ,4knq ,2yzy ,4ed5 ,2ix1 ,4wzq ,354d ,3avv ,4e6b ,3dw4 ,3dw6 ,480d ,2pjp ,1pjj ,1pjo ,2r1s ,2r20 ,433d ,4pei ,4f02 ,2bs0 ,4qpx ,3bso ,2ab4 ,3zd7 ,430d ,1fuf ,3boy ,2py9 ,3m85 ,3q2t ,3bsn ,3cgp ,3cgr ,3cgs ,3ssf ,437d ,1rna ,4kyy ,3k1v ,2gje ,3dd2 ,3m7n ,3nnh ,2ann ,2e9r ,4wzm ,3h5x ,3h5y ,1a34 ,4c9d ,4w5r ,3s7c ,3s8u ,3dvz ,3dw5 ,3dw7 ,483d ,3adi ,1l3d ,1l2x ,3a51 ,4h5p ,1b7f ,2e9z ,387d ,4tv0 ,3hxm ,5amr ,3r2d ,1q9a ,4ay2 ,1msy ,353d ,1csl ,2a43 ,2h1m ,464d ,466d ,434d ,435d ,405d ,3q50 ,4pmw ,1f8v ,2izm ,1k8w ,3avv ,1mhk ,397d ,4gha ,2val ,1m8w ,4peh ,3r2c ,2anr ,1z13 ,4bw0 ,1zbi ,1zdh ,4oq8 ,3avx ,2bgg ,3ncu ,3lrr ,4fnj ,3k49 ,3k4e ,3avy ,2j0s ,7msf ,4u6k ,1zdi ,3ho1 ,3tmi ,2xsl ,4pcj ,1ik5 ,2w89 ,420d ,3og8 ,3iem ,2bny ,1aq3 ,2x1k ,1jid ,2oe6 ,2oe8 ,3gea ,1jzv ,4w5t ,3oij ,2iz9 ,4ato ,4kji ,3hm9 ,3sn2 ,4h8k ,1flt ,1j9h ,3p6y ,4bwm ,1aq4 ,2dr5 ,2zy6 ,2jlt ,4m59 ,4oe1 ,4w5q ,2b2e ,3gm7 ,2bu1 ,3glp ,2dr7 ,2oe5 ,4m7d ,4w5o ,2b2g ,1u1y ,2e9t ,3hjf ,1f27 ,2dr9 ,2zh1 ,2zh7 ,2zh9 ,3lrr ,3trz ,4wqc ,4wcs ,3sj2 ,1o9m ,2ao5 ,3r9w ,2db3 ,4ool ,2j0q ,4m7a ,4ill ,1t0k ,2drb ,2zh2 ,2zh3 ,2zh4 ,2zh5 ,2zh8 ,2zhb ,4qil ,4pgy ,2ec0 ,1e7k ,1sa9 ,2hw8 ,4f8v ,4wcr ,1saq ,4pbd ,4e5c ,4ijs ,3mqk ,2xdb ,3szx ,4j50 ,4yn6 ,1t0e ,4p20 ,4fxd ,4k32 ,4ghl ,3ex7 ,2bq5 ,5msf ,4jah ,2dr8 ,299d ,361d ,3syw ,301d ,1j7t ,4gpx ,1lc4 ,1mw1 ,3dvv ,3bnl ,4qqb ,6msf ,5amq ,2dvi ,2dra ,2zha ,3ova ,1q29 ,2fqn ,2az2 ,2az2 ,2g5k ,3td0 ,4k31 ,2grb ,4jng ,2hyi ,3bt7 ,1zbh ,2zh6 ,1xok ,1zdk ,2f4s ,2f4u ,2o3x ,4gpw ,3td1 ,3s4p ,2be0 ,2bee ,4gpy ,2pwt ,4ktg ,3mei ,3c44 ,2qek ,4bhh ,4wan ,4u8t ,1br3 ,1ec6 ,1di2 ,4jnx ,300d ,359d ,1nta ,1ntb ,4hkq ,1nyi ,4oog ,3wru ,1z7f ,4pmi ,2et4 ,2et5 ,2o3w ,2et3 ,2et8 ,2o3v ,2o3y ,1yrj ,4kq0 ,1rc7 ,2oiy ,2oj0 ,4lg2 ,409d ,1duh ,1sds ,3rzo ,1yzd ,1z79 ,4nfp ,4nfg ,1q2r ,4gg4 ,4nfo ,4qik ,2esj ,2zi0 ,3far ,1nlc ,1y90 ,2awe ,2gic ,3ptx ,3pu0 ,3pu4 ,379d ,4iqs ,3s1m ,3s1n ,3rzd ,2f8s ,4f8u ,4pdp ,3bnp ,2zko ,5bs3 ,2b8r ,1xpf ,1xp7 ,1xpe ,280d ,4jlg ,1gtn ,1gtf ,4phy ,2esi ,4o41 ,4mce ,1rpu ,2qk9 ,2fcx ,2fcy ,2f40 ,4erd ,1o3z ,3erc ,4lgt ,3mj3 ,3mja ,3mjb ,3npu ,4en5 ,3loa ,1ze2 ,2oij ,1yz9 ,3ks8 ,4rwp ,3vrs ,4s3n ,1xjr ,4enc ,2nue ,1y6s ,1wvd ,1y6t ,1y73 ,1y95 ,1y99 ,4rne ,3p4b ,3pu1 ,3zc0 ,1qcu ,4r81 ,3agv ,4wsb ,3r9x ,4wsa ,4wrt ,3b31 ,4py5 ,4zcf ,3lqx ,2b8s ,1y3o ,1y3s ,1yxp ,3ftm ,1kh6 ,1utd ,3s1r ,1yy0 ,1q2s ,3ts0 ,1dfu ,429d ,2pn3 ,4ig8 ,1r9f ,2q1o ,4k27 ,3s2h ,3s2d ,2pxl ,4ena ,1rlg ,4enb ,3wbm ,4oji ,2f8t ,1yyk ,3hhz ,3ts2 ,2i91 ,3s14 ,2uwm ,3fte ,2ply ,462d ,1sdr ,1yyo ,2xb2 ,4a3b ,3s49 ,3s15 ,3fff ,2pxb ,2pxe ,2pxu ,2nug ,2pxd ,2pxf ,2pxk ,2pxp ,2pxq ,2pxt ,2pxv ,1hq1 ,4tux ,4rwn ,4rwo ,3s16 ,3vyy ,1i6h ,4enn ,2f4t ,3s1q ,3r1d ,2qkb ,4p97 ,3s17 ,1dul ,3e5e ,3e5f ,3e5c ,1zbl ,4qoz ,4l8r ,2b3j ,1qln ,2fk6 ,4u38 ,4msb ,488d ,3nvi ,4m2z ,3nj7 ,4v4f ,1c9s ,3po3 ,1mzp ,4m30 ,2nuf ,3t5q ,4a3g ,4gcw ,1jbs ,4m4o ,1m8v ,2w2h ,1s77 ,1yvp ,3hvr ,1jbt ,4xw7 ,4xwf ,2ez6 ,4kz2 ,3fo4 ,3ok2 ,1msw ,4e48 ,3f73 ,1r3e ,4q5v ,4tuw ,1f7y ,4c7o ,1e8o ,1kuq ,3bsu ,1zz5 ,2a04 ,1ser ,3gog ,4ifd ,1s76 ,1a9n ,1dk1 ,4b3o ,3gs5 ,5c7w ,3gao ,2xnz ,3fo6 ,4fe5 ,3g4m ,3ger ,1urn ,3iab ,4wcp ,1ooa ,3r4f ,2b57 ,3ges ,3got ,2ees ,2eet ,2eou ,2eev ,2eew ,3hov ,4a3c ,5c7u ,4fej ,4fel ,2g9c ,4fen ,4feo ,4fep ,3snp ,4a3e ,4pqv ,2oeu ,1kxx ,4bxx ,3siu ,4g6s ,4g6p ,3bbm ,1vtq ,3b5a ,3b5s ,3la5 ,4txz ,4tzy ,1cvj ,2bh2 ,3hoy ,4a3d ,4a3k ,4yep ,3b5f ,3b91 ,3bbk ,3b58 ,2oue ,4lx6 ,4lx5 ,4q5s ,4x4v ,1p6v ,3egz ,357d ,364d ,1t0d ,3l0u ,1yfg ,4tna ,4xnr ,3nkv ,1hys ,4boc ,4a3l ,1wsu ,1ehz ,3tra ,3hk2 ,6tna ,1tn2 ,1i9v ,3bbi

,1mji ,2tra ,1y27 ,1y26 ,4n0t ,2det ,2du3 ,2du4 ,4g6r ,1x9c ,1tn1 ,1zev ,2hop ,1zft ,1vc5 ,1tra ,3moj ,1gsg ,2nqp ,2du6 ,2du5 ,1lbr ,4arc ,4pkd ,2d2l ,4a3f ,3cw5 ,3cw6 ,4tra ,1gts ,1h4s ,1qc0 ,1evv ,4ngf ,2nvt ,4x4s ,2d2k ,1f7v ,1zfv ,2bcy ,2fgp ,3gs8 ,2p7f ,1fir ,4c4w ,4x4q ,2npy ,1x9k ,1vfg ,1qtq ,1zfx ,1vc6 ,4qei ,4jf2 ,3vjr ,4ol8 ,2ake ,4a93 ,2dlc ,4nyg ,3ovs ,3ov7 ,1zjw ,2oih ,2oj3 ,2bcz ,1vbx ,1vby ,1vc0 ,3tup ,1u0b ,1vbz ,1h4q ,2hom ,4yvi ,4yvj ,4yvk ,4x0b ,4wc3 ,3ouy ,2npz ,2rd2 ,1eud ,3gs1 ,1f7u ,4x4o ,1exd ,2ozb ,1s1f ,1s1j ,1s1j ,3e2e ,2hok ,1qu3 ,4nyb ,4nyc ,1ffy ,1qu2 ,4nyd ,2g3s ,4jxx ,1euy ,4kr2 ,4jyz ,4jxz ,1gtr ,2re8 ,4pr6 ,2hoj ,2hol ,1j1u ,1i6u ,2bj6 ,3x1l ,4wc4 ,2dr2 ,4wc5 ,4x4r ,3ovb ,3wqz ,1o0c ,3wqy ,2hoo ,4wj4 ,4zc7 ,1q93 ,4wc6 ,4wc2 ,4wc7 ,3po2 ,4k4t ,3bnn ,4prf ,1ob2 ,4kr3 ,4by7 ,3bno ,1qf6 ,2vum ,1q96 ,3a3a ,4xjn ,1b23 ,2rfk ,1o0b ,1c0a ,4k4s ,3amt ,3amu ,4kr9 ,2zuf ,4k4w ,1mme ,1qrt ,4ari ,4p5j ,3u56 ,3umy ,2hvy ,1eiy ,1drz ,4rdx ,1qru ,2zue ,1qrs ,5btm ,4mcf ,4qi2 ,2zzm ,3lww ,3cz3 ,4lvw ,4lvx ,4lvy ,4lvz ,4db2 ,2e2j ,4kr6 ,3lwr ,2gfw ,3hfw ,4as1 ,4qvi ,3u4m ,4qg3 ,4lw0 ,3gtj ,2iy5 ,3gtl ,4kr7 ,4k4u ,3lwg ,3lwo ,3lwp ,1qbp ,3sd3 ,4x4u ,3am1 ,3hax ,4lvv ,4q9q ,4q9r ,2yu9 ,2e2i ,2nvq ,1r9t ,4y52 ,4y7n ,3m3y ,1h3e ,3qsy ,1k9w ,4aob ,3iqp ,2gis ,2i82 ,3iqn ,2ydh ,4b5r ,3iqr ,3zju ,1feu ,3dh3 ,3al0 ,4rum ,3bnq ,2nok ,1s03 ,2pn4 ,3gx6 ,3gx7 ,4kze ,3gx2 ,2fzc ,3gx3 ,3gx5 ,3h12 ,4x4n ,4kzd ,4ts2 ,3fu2 ,1d4r ,4yb1 ,4yhw ,1zci ,4i81 ,4oqu ,3zjt ,1tfy ,3bns ,4wkj ,1tfw ,4o26 ,4puo ,4ts0 ,4q0b ,3suh ,3sus ,3suy ,1nuj ,1nuv ,3p59 ,1z43 ,3zla ,3irw ,3muv ,4rzd ,1lmg ,3htx ,3ciy ,1yyw ,3mut ,3zju ,3mxh ,3mum ,3mur ,3bnr ,2vpl ,4w92 ,4pwd ,4x4t ,1u63 ,3hou ,4pqu ,1ykq ,1ykv ,3ucu ,4w90 ,3w3s ,1yls ,3ucz ,3ud4 ,3ud3 ,4wfl ,1duq ,4qlm ,3f30 ,3f2t ,3f2x ,3f2y ,3f2w ,3f2q ,3nmu ,2xdd ,1egk ,3a6p ,4jrc ,4qyz ,3f4h ,3f4e ,3f4g ,4qk9 ,2yif ,4kqy ,4tvx ,4qln ,1qa6 ,4g7o ,1zx7 ,2yie ,5btp ,4qka ,4csf ,4mgm ,1y39 ,4qk8 ,1hc8 ,5axw ,5czz ,1mms ,4x4p ,4un5 ,4un3 ,4un4 ,1un6 ,4ilm ,3trz ,3rw6 ,3skr ,1l9a ,3ds7 ,3skw ,3skl ,3skt ,4p3e ,1mfq ,4znp ,3ivn ,3icq ,2o5i ,4k4x ,3slm ,2oiu ,3slq ,3skz ,406d ,2qus ,4meg ,1ddy ,3siv ,3ski ,1hmh ,3b4c ,2o5j ,2ppb ,4uyk ,4u7u ,3epk ,3epj ,3nbd ,3b4a ,2ho6 ,2gcv ,2h0w ,5cd4 ,3eph ,2quw ,2zzn ,4meh ,3b4b ,2ho7 ,2gcs ,2h0x ,4zt0 ,1h38 ,4zt9 ,2der ,2zni ,4k4z ,2zxu ,2zm5 ,3pla ,3npp ,2azz ,1efw ,1il2 ,2qzb ,2wj8 ,3wfs ,2qux ,3foz ,2deu ,1u9s ,1j2b ,2y9h ,1asy ,2cky ,2csx ,2ct8 ,1g59 ,3d2x ,3d2g ,3d2v ,2cv0 ,3q3z ,2qwy ,2d6f ,1asz ,1zho ,2byt ,2cv1 ,2cv2 ,1n78 ,1gax ,1ivs ,2v0g ,4erj ,4erl ,3d0x ,3d0u ,2fmt ,3ol8 ,1s0v ,2bte ,2dxi ,1n77 ,3ol6 ,4aq7 ,2gdi ,4nya ,3ol7 ,4gxy ,4frg ,2r8s ,4rgf ,4rge ,3olb ,3ol9 ,4cqn ,4yb0 ,3rg5 ,4yaz ,3zgz ,3dig ,3dis ,3dj0 ,3dil ,3diz ,3diq ,3dix ,3dim ,3dir ,3dj2 ,3dio ,3diy ,3oxj ,3owz ,1et4 ,1wz2 ,2qkk ,3oxb ,3oxd ,3oww ,3owi ,3ox0 ,3oxe ,3oxm ,3k0j ,1glx ,4y1m ,3add ,3adc ,3adb ,4p9r ,3cun ,3iwn ,4p95 ,3ktw ,4k50 ,3cul ,4xco ,3p22 ,4frn ,2v3c ,4y1l ,4y1j ,4wfm ,2ggt ,4v9e ,2xd0 ,4yco ,4plx ,4uyj ,1m5o ,1ttt ,1m5k ,1ob5 ,1u6b ,3bo3 ,1m5v ,1m5p ,4eya ,1znn ,3bo2 ,4v99 ,4oo8 ,2czj ,4m6d ,3v7e ,2il9 ,3ivk ,3rkf ,4pjo ,1nbs ,3hnn ,3r1l ,3r1h ,3r1c ,4qjd ,2a64 ,3akz ,3wfr ,1i8v ,3kfu ,1kog ,1hr2 ,1gid ,3pdr ,4mgn ,4oq9 ,4nia ,3bwp ,4ick ,3eoh ,4fax ,4fau ,4e8p ,4e8r ,4e8q ,4e8n ,4fb0 ,4e8m ,3eog ,4faq ,4e8k ,3igi ,4faw ,3g78 ,4far ,4e8t ,1fg0 ,3g9c ,3g96 ,3g8s ,3g8t ,3l3c ,2nz4 ,4v8i ,4v8h ,4v7x ,4v7z ,4v7y ,4v7w ,4v8g ,1fka ,4v6c ,4v7u ,4v7v ,4v7s ,4v7t ,2uxd ,4u1u ,4u1v ,4u20 ,4u25 ,4u27 ,4u26 ,4u24 ,4v84 ,4v85 ,4wfl ,4v83 ,2hhh ,2zm6 ,4yhh ,4v95 ,4lf6 ,4ji3 ,4dv7 ,4dr3 ,4khp ,4lf9 ,1lib ,4lfb ,4j1l ,4lf4 ,1hr0 ,4lf7 ,4lf8 ,1i94 ,4duy ,4dr2 ,4dv6 ,4ji0 ,1hnz ,1hnw ,1hnx ,1fjg ,1j5e ,4j17 ,1xnq ,2vqe ,4gkk ,2uxb ,1xmo ,2vqf ,1xnr ,1xmq ,4gkj ,4k0k ,4jv5 ,2e5l ,2uxc ,1n33 ,1libm ,2uub ,2uuc ,3t1h ,3t1y ,4b3s ,2uua ,2uua9 ,4aqy ,4b3r ,4jya ,4b3t ,4dr5 ,1lib ,1n32 ,4b3m ,4v6a ,4v9s ,4v9r ,4dr6 ,4v9a ,1vy6 ,4v9n ,1vy7 ,4v90 ,4v9h ,1vvj ,4l47 ,4lsk ,4lnt ,4lt8 ,4tue ,4w2h ,4v5a ,4v9k ,4v9l ,4woi ,4v9e ,4v64 ,4v4h ,4v4q ,4v54 ,4v52 ,4v57 ,4v5e ,4v9b ,4v5j ,4v8x ,4v67 ,4v50 ,4v63 ,4v7j ,4wu1 ,4v5k ,4wzd ,4v51 ,4v6g ,4v7m ,4wzo ,4v7l ,1vy4 ,4wro ,1vy5 ,4w2i ,4wsd ,4wt1 ,4v9i ,4wqr ,4w2g ,4w2f ,4v5d ,4v5c ,4wq1 ,4v5l ,4u4z ,4u3m ,4u53 ,4u4y ,4u4q ,4u56 ,4u3n ,4u55 ,4u4n ,4u51 ,4u4u ,4u52 ,4u50 ,4u4r ,4u3u ,4v8n ,4v5s ,4v5q ,4v8b ,4v5p ,4v5r ,4wr6 ,4v8d ,4wsm ,4wra ,4u6f ,4v88 ,1p9x ,2o44 ,2ogm ,1ond ,2aar ,1jxz ,1j5a ,1k01 ,1jzy ,3pip ,1njp ,3pio ,2d3o ,3dll ,2zjq ,3cf5 ,2zjr ,4io9 ,4ioa ,4z8c ,1ffk ,1y69 ,2qa4 ,3g4s ,3ccj ,1w2b ,2qex ,1n8r ,3ow2 ,1yjn ,3ccr ,1yjj ,1y9j ,3g6e ,1yi2 ,2otl ,1yit ,3i56 ,1nji ,3ccs ,1k73 ,2otj ,1s72 ,1yij ,3cc2 ,1jj2 ,3cc7 ,3ccl ,3ccq ,3cc4 ,3cce ,3ccv ,3ccu ,3ccm ,1kc8 ,1k8a ,1k9m ,1q81 ,1q82 ,1kd1 ,1mlk ,1m90 ,1vqo ,3g71 ,1vqk ,1yhq ,3cpw ,1vq8 ,1vq9 ,3cd6 ,1vq6 ,3cme ,3ccx ,1kqs ,1vq4 ,1vq5 ,1q86 ,3cma ,1vqn ,1vq7 ,1vql ,1vq5 ,1vqm ,1xpb ,1sm1 ,1nwx ,1nkw ,1qvq ,1nwy ,1qvq ,4v9f ,4v8a ,4zer ,4v9q ,4v9p ,4v9o ,4wqy ,4www ,4wqf ,4y4p ,4y4o ,4wqu ,4wpo ,4z3q ,4z3s ,4z3r ,4v8q ,4wt8 ,4v6f ,4v8c ,4v87 ,4v8f ,4v8e ,4w2e ,4ybb ,4v9d

#### Solution NMR structures (591 files)

124d ,176d ,17ra ,1ait ,1a3m ,1a4d ,1a4t ,1a5l ,1a60 ,1a9l ,1ac3 ,1afx ,1ajf ,1ajl ,1ajt ,1aju ,1akx ,1al5 ,1am0 ,1anr ,1aqq ,1arj ,1ato ,1atv ,1atw ,1aud ,1b36 ,1bau ,1bgz ,1biv ,1bj2 ,1bn0 ,1bvj ,1byj ,1bz2 ,1bz3 ,1bzt ,1bzu ,1c0o ,1c2q ,1c4l ,1cq5 ,1cql ,1cx5 ,1d0t ,1d0u ,1d6k ,1drr ,1dz5 ,1e4p ,1e95 ,1ebq ,1ebr ,1ebs ,1efs ,1eht ,1ei2 ,1ejz ,1eka ,1ekd ,1ekz ,1elh ,1esh ,1esy ,1etf ,1etg ,1exy ,1f5g ,1f5h ,1f5u ,1f6u ,1f6x ,1f6z ,1f78 ,1f79 ,1f7f ,1f7g ,1f7h ,1f7i ,1f84 ,1f85 ,1f9l ,1feq ,1fhk ,1fje ,1f8 ,1fmm ,1fmx ,1fqz ,1fyo ,1fyp ,1g3a ,1g70 ,1guc ,1h0q ,1hg9 ,1hji ,1hlx ,1hs1 ,1hs2 ,1hs3 ,1hs4 ,1hs8 ,1hwq ,1i3x ,1i3y ,1i46 ,1i4b ,1i4c ,1i9f ,1i9k ,1idv ,1ie1 ,1ie2 ,1ik1 ,1ikd ,1j4y ,1jo7 ,1jox ,1jp0 ,1jtj ,1jtw ,1ju1 ,1ju7 ,1jur ,1jwc ,1jzc ,1k1g ,1k2g ,1k4a ,1k4b ,1k5i ,1k6g ,1k6h ,1k8s ,1kaj ,1kis ,1kka ,1kks ,1koc ,1kod ,1kos ,1kp7 ,1kpd ,1kpy ,1kpz ,1llc ,1llw ,1lc6 ,1ldz ,1lmv ,1lpw ,1luu ,1lux ,1lvj ,1m5l ,1m82 ,1mel ,1mfj ,1mfk ,1mfy ,1mis ,1mnb ,1mnx ,1mt4 ,1muv ,1mv1 ,1mv2 ,1mv6 ,1mwg ,1my9 ,1n53 ,1n66 ,1n8x ,1na2 ,1nbk ,1nbr ,1nc0 ,1nem ,1ntq ,1nts ,1ntt ,1nxx ,1nyb ,1nz1 ,1o15 ,1okf ,1oln ,1oo7 ,1oq0 ,1osw ,1ow9 ,1p5m ,1p5n ,1p5o ,1p5p ,1pbl ,1pbm ,1pbr ,1pjj ,1q75 ,1q8n ,1qc8 ,1qd3 ,1qes ,1qet ,1qfq ,1qwa ,1qwb ,1r2p ,1r3x ,1r4h ,1r7w ,1r7z ,1rau ,1raw ,1rfr ,1rgo ,1rht ,1rkj ,1rng ,1rnk ,1roq ,1rrd ,1rrr ,1s2f ,1s34 ,1s9l ,1s9s ,1scl ,1slo ,1slp ,1sy4 ,1syz ,1szy ,1t28 ,1t2r ,1t4l ,1t4x ,1tbk ,1tfn ,1tjz ,1tlr ,1tob ,1tut ,1txs ,1u2a ,1u3k ,1u6p ,1ull ,1uts ,1uud ,1uui ,1uuu ,1vop ,1wks ,1wts ,1wtt ,1wwd ,1wwe ,1wwf ,1wwg ,1xhp ,1xsg ,1xsh ,1xst ,1xsu ,1xv0 ,1xv6 ,1xwp ,1xwu ,1yfv ,1yg3 ,1yg4 ,1ylg ,1ymo ,1yn1 ,1yn2 ,1ync ,1yne ,1yng ,1ysv ,1z2j ,1z30 ,1z31 ,1zbn ,1zc5 ,1zif ,1zig ,1zih ,219d ,28sp ,28sr ,2a9l ,2a9x ,2ad9 ,2adb ,2adc ,2adt ,2aht ,2ap0 ,2ap5 ,2au4 ,2awq ,2b6g ,2b7g ,2bj2 ,2c06 ,2cd1 ,2cd3 ,2cd5 ,2cd6 ,2cjk ,2d17 ,2d18 ,2d19 ,2d1a ,2d1b ,2dd1 ,2dd2 ,2dd3 ,2err ,2es5 ,2ese ,2euy ,2evy ,2f4x ,2f87 ,2f88 ,2fdt ,2fey ,2fy1 ,2g1g ,2g1w ,2gbh ,2gio ,2gip ,2gm0 ,2grw ,2gv3 ,2gv4 ,2gvo ,2h49 ,2hem ,2hgh ,2hns ,2hua ,2i2y ,2i7e ,2i7z ,2ihx ,2irn ,2iro ,2ixy ,2ixz ,2jpp ,2jq7 ,2jr4 ,2jrg ,2jrq ,2jse ,2jsg ,2jtp ,2juk ,2jww ,2jxq ,2jxs ,2jxv ,2jyf ,2jyh ,2jyj ,2jym ,2k3z ,2k41 ,2k4c ,2k5z ,2k65 ,2k66 ,2k7e ,2k95 ,2k96 ,2kbp ,2kd4 ,2kd8 ,2kdq ,2ke6 ,2kez ,2kf0 ,2kfy ,2kg0 ,2kg1 ,2kqp ,2kh9 ,2khy ,2km8 ,2kmj ,2koc ,2kp3 ,2kp4 ,2kpc ,2kpd ,2kpv ,2krl ,2krp ,2krq ,2krv ,2krw ,2kry ,2krz ,2ktz ,2ku0 ,2kur ,2kuu ,2kuv ,2kuw ,2kvn ,2kwg ,2kx5 ,2kx8 ,2kxm ,2kxn ,2kxz ,2ky0 ,2ky1 ,2ky2 ,2kyd ,2kye ,2kzl ,2l1f ,2l1v ,2l2j ,2l2k ,2l3c ,2l3e ,2l3j ,2l41 ,2l5d ,2l5z ,2l6i ,2l8c ,2l8f ,2l8h ,2l8u ,2l8w ,2l94 ,2l9e ,2la5 ,2la9 ,2lac ,2lar ,2lb4 ,2ljb ,2lbc ,2lbl ,2lbq ,2lbr ,2lbs ,2lc8 ,2ldl ,2ldt ,2ldz ,2leb ,2lec ,2lhp ,2li4 ,2li8 ,2ljj ,2lk3 ,2lkr ,2lp9 ,2lpa ,2lps ,2lpt ,2lqz ,2lu0 ,2lub ,2lun ,2lup ,2lv0 ,2lvy ,2lwk ,2lx1 ,2m12 ,2m18 ,2m1o ,2m1v ,2m21 ,2m22 ,2m23 ,2m24 ,2m39 ,2m4q ,2m4w ,2m57 ,2m58 ,2m5u ,2m8d ,2m8k ,2mb0 ,2meq ,2mer ,2mf0 ,2mf1 ,2mfc ,2mfd ,2mfe ,2mff ,2mfg ,2mfh ,2mgz ,2mhi ,2mi0 ,2mis ,2miy ,2mjh ,2mki ,2mkk ,2mkn ,2mn0 ,2mnc ,2mqt ,2mqv ,2ms0 ,2ms1 ,2ms5 ,2mtj ,2mtk ,2mtv ,2mvs ,2mxj ,2mxk ,2mxl ,2mxy ,2mz1 ,2n1q ,2n2o ,2n2p ,2n3q ,2n3r ,2n4j ,2o32 ,2o33 ,2o81 ,2o83 ,2oj7 ,2oj8 ,2oom ,2p89 ,2pcv ,2pcw ,2pn9 ,2qh2 ,2qh3 ,2qh4 ,2rlu ,2rn1 ,2ro2 ,2rp0 ,2rp1 ,2rpk ,2rpt ,2rqc ,2rqj ,2rra ,2rrc ,2rs2 ,2rsk ,2ru3 ,2ru7 ,2tob ,2tpk ,2u2a ,2xc7 ,2xeb ,2xfm ,2y95 ,2yh1 ,3php ,484d ,4a4r ,4a4s ,4a4t ,4a4u ,4b8t ,4bs2 ,4by9 ,4cio ,5a17 ,5a18 ,8drh ,8sph
